1     **TCAB1 prevents nucleolar accumulation of the telomerase RNA to**  
2                     **promote telomerase assembly**

3  
4     Basma S. Al-Masraf <sup>1,2,3</sup>, Gloria I. Perez <sup>1</sup>, Kate Adams-Boone <sup>1</sup>, Scott B. Cohen <sup>4</sup>, Li  
5                     Han <sup>5</sup>, Kefei Yu <sup>5</sup>, Jens C. Schmidt <sup>1,6,\*</sup>

6  
7     <sup>1</sup> Institute for Quantitative Health Sciences and Engineering, Michigan State University,  
8                     East Lansing, MI, U.S.A.

9     <sup>2</sup> College of Osteopathic Medicine, Michigan State University, East Lansing, MI, U.S.A.

10     <sup>3</sup> Cellular and Molecular Biology Graduate Program, College of Natural Sciences,  
11                     Michigan State University, East Lansing, MI, U.S.A.

12     <sup>4</sup> Children's Medical Research Institute and University of Sydney, Westmead, NSW  
13                     2145, Australia.

14     <sup>5</sup> Department of Microbiology and Molecular Genetics, Michigan State University, East  
15                     Lansing, MI, U.S.A.

16     <sup>6</sup> Department of Obstetrics, Gynecology, and Reproductive Biology, Michigan State  
17                     University, East Lansing, MI, U.S.A.

18

19                     \* Correspondence: [schmi706@msu.edu](mailto:schmi706@msu.edu)

20

21 **Abstract**

22 Localization of a wide variety of RNAs to non-membrane bound cellular compartments  
23 such as nucleoli, Cajal bodies, and stress-granules is critical for their function and  
24 stability. The molecular mechanisms that underly the recruitment and exclusion of specific  
25 RNAs from these phase-separated organelles is poorly understood. Telomerase is a  
26 ribonucleoprotein (RNP), that is composed of the reverse transcriptase protein TERT, the  
27 telomerase RNA (TR), and several auxiliary proteins that associate with TR, including  
28 TCAB1. Here we show that, that in the absence of TCAB1, TR is sequestered in the  
29 nucleolus, while TERT localizes to the nucleoplasm and is excluded from the nucleolus,  
30 which prevents telomerase assembly. Thus, nuclear compartmentalization by the non-  
31 membrane bound nucleolus counteracts telomerase assembly and TCAB1 is required to  
32 exclude the telomerase RNA from the nucleolus. Our work provides general insight into  
33 the mechanism and functional consequences of RNA recruitment to organelles formed  
34 by phase-separation and proposes a new model explaining the critical role of TCAB1 in  
35 telomerase function.

## 36 **Introduction**

37 Human cells contain a number of non-membrane bound organelles that carry out critical  
38 cellular functions. For instance, nucleoli and Cajal bodies are phase-separated nuclear  
39 organelles that play important roles in the biogenesis and maturation of many cellular  
40 RNAs (Hyman et al., 2014; Mitrea and Kriwacki, 2016). Nucleoli and Cajal bodies contain  
41 a wide range of small nucleolar and small Cajal body-specific RNAs (snoRNAs and  
42 scaRNAs, respectively). A subset of these snoRNAs and scaRNAs are bound by the  
43 H/ACA complex, which contains NOP10, NHP2, GAR1, and the pseudouridylase  
44 dyskerin, which modifies ribosomal and spliceosomal RNA precursors and other RNAs  
45 (Angrisani et al., 2014). A key difference between snoRNAs and scaRNAs is the presence  
46 of the Cajal-body box (CAB-box) motif in scaRNAs that directly associates with the  
47 telomerase Cajal body protein 1 (TCAB1, also known as WRAP53) (Jády et al., 2004;  
48 Schmidt and Cech, 2015; Venteicher et al., 2009). TCAB1 is required for the recruitment  
49 of scaRNAs to Cajal bodies and in its absence scaRNAs localize to the nucleolus  
50 (Tycowski et al., 2009). Therefore, TCAB1 controls which phase-separated nuclear  
51 organelle scaRNAs associate with. Importantly, the molecular mechanism by which  
52 TCAB1 drives exclusion of scaRNAs from the nucleolus and facilitates their recruitment  
53 to Cajal bodies is unknown. In addition, it is unclear whether miss-localization of scaRNAs  
54 to the nucleolus has functional consequences.

55

56 The telomerase RNA (TR) is a scaRNA and like other scaRNAs its association with  
57 nucleoli and Cajal bodies is controlled by TCAB1 (Schmidt and Cech, 2015). Telomere  
58 maintenance by telomerase is essential for continuous proliferation of stem cell

59 populations in the human body and most cancers require telomerase activity for their  
60 survival (Stewart and Weinberg, 2006). To compensate for the incomplete replication of  
61 chromosome ends, telomerase appends TTAGGG repeats to the telomeric single-  
62 stranded overhang (Schmidt and Cech, 2015). Telomerase-mediated telomere  
63 maintenance requires three critical steps: Telomerase assembly, telomerase recruitment  
64 to telomeres, and telomeric repeat synthesis (Schmidt and Cech, 2015). Mutations in  
65 several genes have been identified that cause deficiencies in one of these critical steps  
66 and lead to a variety of diseases known as telomere syndromes, characterized by  
67 premature depletion of stem cell populations (Armanios and Blackburn, 2012). In addition,  
68 telomerase is inappropriately activated in >85% of cancers (Stewart and Weinberg,  
69 2006). While telomerase recruitment to telomeres (Nandakumar and Cech, 2013) and  
70 telomerase catalysis (Wu et al., 2017) have been studied extensively, much less is known  
71 about telomerase assembly. Importantly, telomerase assembly could be targeted to  
72 reduce telomerase activity in cancer cells, or to increase telomerase function in patients  
73 affected by genetically defined telomerase deficiency syndromes (Nagpal et al., 2020;  
74 Shukla et al., 2020).

75

76 Telomerase is a complex ribonucleoprotein (RNP). The core components of telomerase  
77 are the telomerase reverse transcriptase (TERT) protein, TR, the H/ACA complex, and  
78 TCAB1 (Schmidt and Cech, 2015). The primary function of the H/ACA complex is to  
79 stabilize TR, by directly binding to its 3'-end, preventing the exonucleolytic degradation of  
80 TR (Stuart et al., 2015; Tummala et al., 2015). The 3'-end formation of TR is tightly  
81 regulated by the competing activities of the poly-(A) polymerase PAPD5 and the nuclease

82 PARN (Shukla et al., 2016; Tseng et al., 2015). Loss of TCAB1 function leads to telomere  
83 attrition in a variety of cell lines (Chen et al., 2018; Venteicher et al., 2009; Vogan et al.,  
84 2016; Zhong et al., 2011). In addition, multiple mutations in TCAB1 have been identified  
85 that cause misfolding of TCAB1 and lead to dyskeratosis congenita, a telomere syndrome  
86 (Freund et al., 2014; Zhong et al., 2011). While these observations highlight that TCAB1  
87 is necessary for telomere maintenance, the underlying molecular mechanism is unclear.  
88 Initially, it was proposed that TCAB1 is required for telomerase recruitment to telomeres  
89 (Stern et al., 2012; Venteicher et al., 2009). A more recent study suggested that TCAB1  
90 is required for the correct folding of TR, and that its absence causes a reduction in  
91 telomerase activity (Chen et al., 2018). Importantly, all previous studies have come to the  
92 conclusion that TCAB1 is not required for telomerase assembly.

93

94 Here we analyze telomerase assembly in intact cells and by purification of the telomerase  
95 RNP and demonstrate that, contrary to previous findings, TCAB1 promotes telomerase  
96 assembly *in vivo*. Using a combination of genetic perturbations, biochemical analysis of  
97 telomerase function, cell biological approaches, and single-molecule live cell imaging, we  
98 show that in the absence of TCAB1, TR is sequestered in the nucleolus while TERT is  
99 excluded from the nucleolus. The spatial separation of TERT and TR that we observe in  
100 our experiments is inconsistent with proper telomerase assembly. Furthermore, we show  
101 that the limited amount of telomerase that can assemble in the absence of TCAB1 is fully  
102 active and can localize to telomeres, suggesting that TCAB1 is not necessary for the  
103 enzymatic function of telomerase or its recruitment to telomeres. We conclude that the  
104 sequestration of TR in the nucleolus, when TCAB1 is absent, prevents its association with

105 TERT, and that this lack of telomerase assembly is the molecular mechanism underlying  
106 the critical role of TCAB1 in telomere maintenance. Our results also demonstrate that the  
107 nucleolar phase separation constitutes a barrier for telomerase assembly and suggest  
108 that incompletely assembled RNPs are tightly associated with the nucleolus and do not  
109 readily enter the nucleoplasm.

110

## 111 **Results**

### 112 **Loss of TCAB1 leads to nucleolar accumulation of TR**

113 To confirm that TR is sequestered in the nucleolus in the absence of TCAB1, we knocked  
114 out TCAB1 in HeLa cells and HeLa cells expressing 3xFLAG-HaloTag-TERT (Halo-  
115 TERT) using Cas9 with two guide RNAs to delete exons 2 and 3 from the TCAB1 gene,  
116 which removes the coding sequence for residues 144-214 of TCAB1 and results in a  
117 frame shift (Figure 1 – figure supplement 1). TCAB1 knock-out was validated by Southern  
118 blot, PCR, Western blot, and immunofluorescence imaging (IF, Fig. 1A-C, Figure 1 –  
119 figure supplement 1). To assure that no truncated form of TCAB1 was expressed in  
120 TCAB1 knock-out cells, we assessed TCAB1 expression using two antibodies, targeting  
121 the N-terminus and C-terminus of TACB1, respectively (Figure 1 – figure supplement 1).  
122 TCAB1 knock-out cells continuously grew at approximately 60% of the rate of their  
123 parental cell lines (Figure 1 – figure supplement 1). Telomeres in cells lacking TCAB1  
124 were stable at a shorter length than their parental control, as previously described (Vogan  
125 et al., 2016). Fluorescence *in situ* hybridization (FISH) demonstrated that TR accumulates  
126 in the nucleolus in cells that lack TCAB1, as indicated by co-localization of TR and  
127 nucleolar dyskerin signals. Importantly, expression of GFP-TCAB1 in TCAB1 knock-out  
128 cells rescued TR localization to Cajal bodies (Figure 1 – figure supplement 1), confirming  
129 that the miss-localization of TR to nucleoli is caused by absence of TCAB1. These  
130 observations demonstrate that TCAB1 is required to prevent TR accumulation in the  
131 nucleolus.

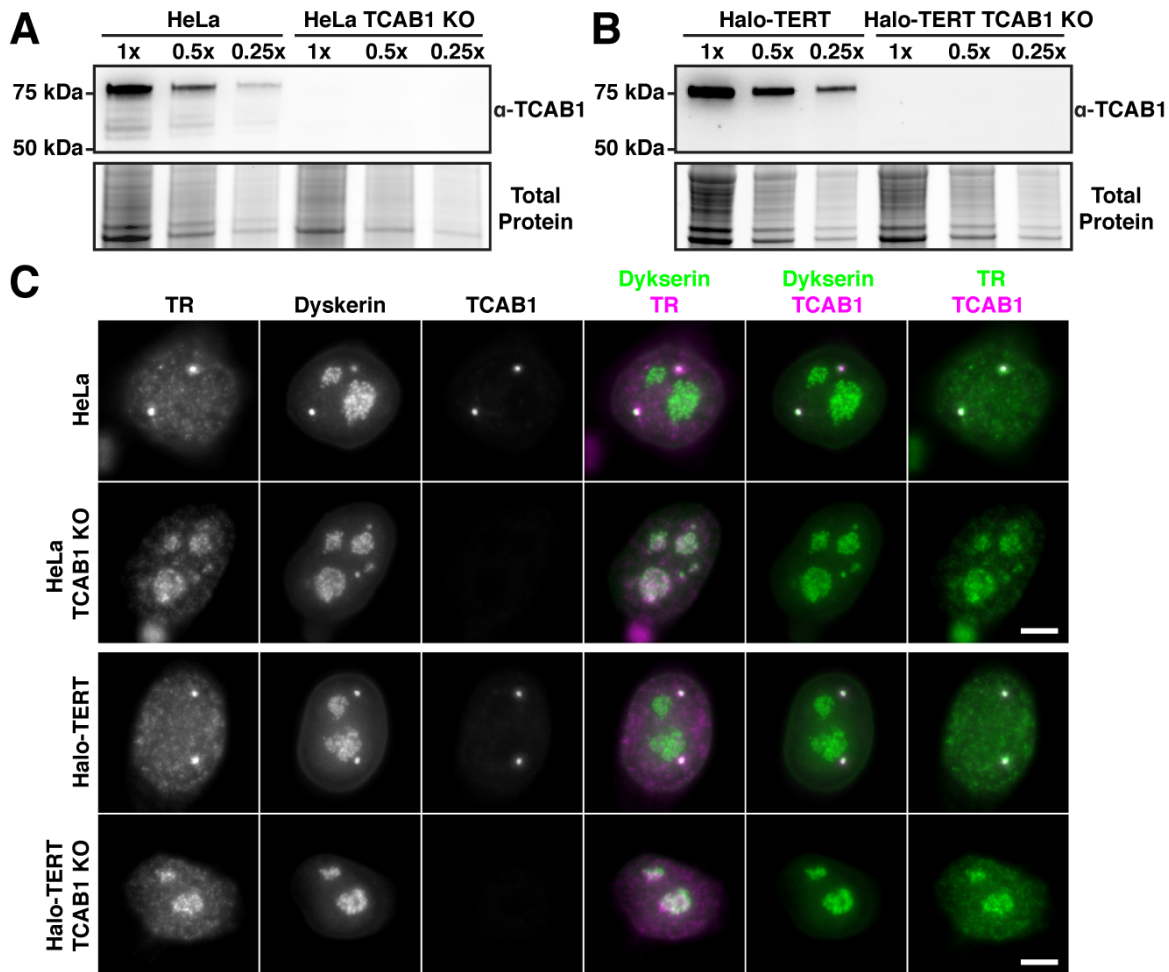

132

**Figure 1. TR is localized to nucleoli in TCAB1 knock-out cells. (A-B)** Western blot demonstrating the absence of TCAB1 protein in TCAB1 knock-out cell lines generated from **(A)** HeLa and **(B)** Halo-TERT parental cell lines (probed with Proteintech TCAB1 antibody). **(C)** Immuno-fluorescence with anti-dyskerin and anti-TCAB1 antibodies coupled to fluorescence in-situ hybridization with probes against TR, demonstrating the absence of TCAB1 and TR localization to nucleoli in TCAB1 knock-out cells (scale bar = 5 μm).

133 **TERT is excluded from nucleoli**

134 Our previous observations demonstrated that TERT does not enter nucleoli in human  
135 cancer cells (Schmidt et al., 2016). To confirm these results, we performed single-  
136 molecule imaging of 3xFLAG-HaloTag-TERT in living HeLa cells. Consistent with our  
137 previous results, 3xFLAG-HaloTag-TERT was not observed entering or overlapping with



138 nucleoli, which are discernible as circular shapes in the nucleus under transmitted light

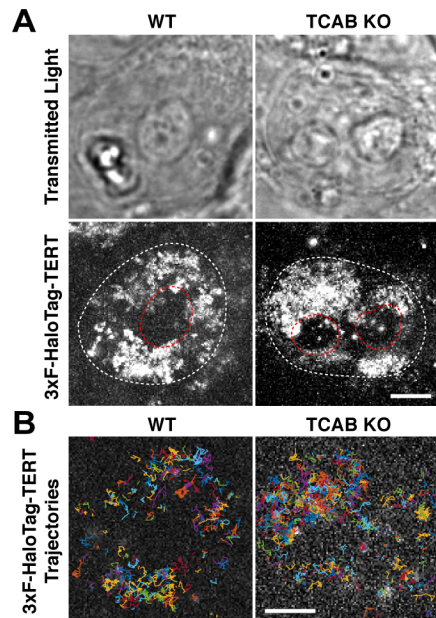

**Figure 2. TERT is excluded from nucleoli in control and TCAB1 knock-out cells. (A)** Maximum intensity projections of 2000 frames of 3xFLAG-HaloTag (JF646) TERT movies (bottom), demonstrating that the TERT signal does not overlap with the nucleolus detected as circular shape in the transmitted light image in control and TCAB1 knock-out cells (top, red dashed line, scale bar = 2  $\mu$ m). **(B)** TERT particle trajectories from the cells shown in Fig. 2A, demonstrating that TERT molecules move parallel to or away from the nucleolus when located at the interface between the nucleolus and nucleoplasm.

139

140 illumination (Fig. 2A,B, Figure 2 – figure supplement 1, Movie 1,2). TERT trajectories in  
141 close proximity to nucleoli revealed that their movement is biased away from the  
142 nucleolus, suggesting that TERT is repelled by the nucleolus (Fig. 2B). To exclude the  
143 possibility that nucleolar exclusion is a consequence of the 3xFLAG-HaloTag on the N-  
144 terminus of TERT used in our experiments, we transiently expressed the 3xFLAG-  
145 HaloTag fused to a nuclear localization sequence (NLS) in HeLa cells. Single-molecule  
146 imaging demonstrated that the nuclear 3xFLAG-HaloTag signals overlapped with the  
147 nucleolus (Figure 2 – figure supplement 1, Movie 3). Similar to the 3xFLAG-HaloTag  
148 alone, 3xFLAG-HaloTag-dyskerin also localized to the nucleolus (Figure 2 – figure  
149 supplement 1). These results demonstrate that 3xFLAG-HaloTag-TERT is excluded from  
150 the nucleolus and that this exclusion is not caused by the 3xFLAG-HaloTag but instead  
151 is an intrinsic property of the TERT protein.

152

153 **TERT and TR localize to distinct nuclear compartments in cells lacking TCAB1**

154 It is well established that telomerase assembly is incomplete in human cancer cells, which  
155 leads to substantial pools of TERT and TR that are not assembled into telomerase RNPs  
156 (Xi and Cech, 2014). Together with our observation that TERT molecules rarely enter the  
157 nucleolus (Schmidt et al., 2016) this suggests that both free TERT and assembled  
158 telomerase RNPs do not enter the nucleolus. To test whether, like TR, TERT accumulates  
159 in the nucleolus in cells lacking TCAB1, we carried out single-molecule imaging of  
160 3xFLAG-HaloTag-TERT in TCAB1 knock-out cells. Strikingly, TERT localization is  
161 unchanged in cells lacking TCAB1 (Fig. 2A,B). This suggests that unlike TR, TERT does  
162 not accumulate in nucleoli when TCAB1 is absent.

163 The experiments described so far demonstrate that TCAB1 is enriched in nucleoli  
164 and TERT is excluded from nucleoli in cells lacking TCAB1, but they do not  
165 simultaneously detect TERT and TR in the same cell. To overcome this limitation, we  
166 over-expressed mCherry-TERT and TR in TCAB1 knock-out cells. In controls, TERT and  
167 TR colocalized with dyskerin at telomeres marked by TRF2 (Fig. 3A). In addition, analysis  
168 of the TERT signal across the nucleus and nucleolus revealed that TERT was depleted  
169 from the nucleolus (Fig. 3B). Importantly, mCherry-dyskerin localized to the nucleolus,  
170 demonstrating that the mCherry-tag does not lead to nucleolar exclusion of its fusion  
171 partner (Figure 3 – figure supplement 1). In cells lacking TCAB1, mCherry-TERT was  
172 diffusely localized in the nucleoplasm, localized to a subset of telomeres, and was  
173 depleted from the nucleolus (Fig. 3A,C). Similar to endogenous TR, overexpressed TR  
174 was enriched in the nucleolus in TCAB1 knock-out cells (Fig. 3A). In addition, TR was  
175 frequently co-localized with telomeres when mCherry-TERT and TR were overexpressed

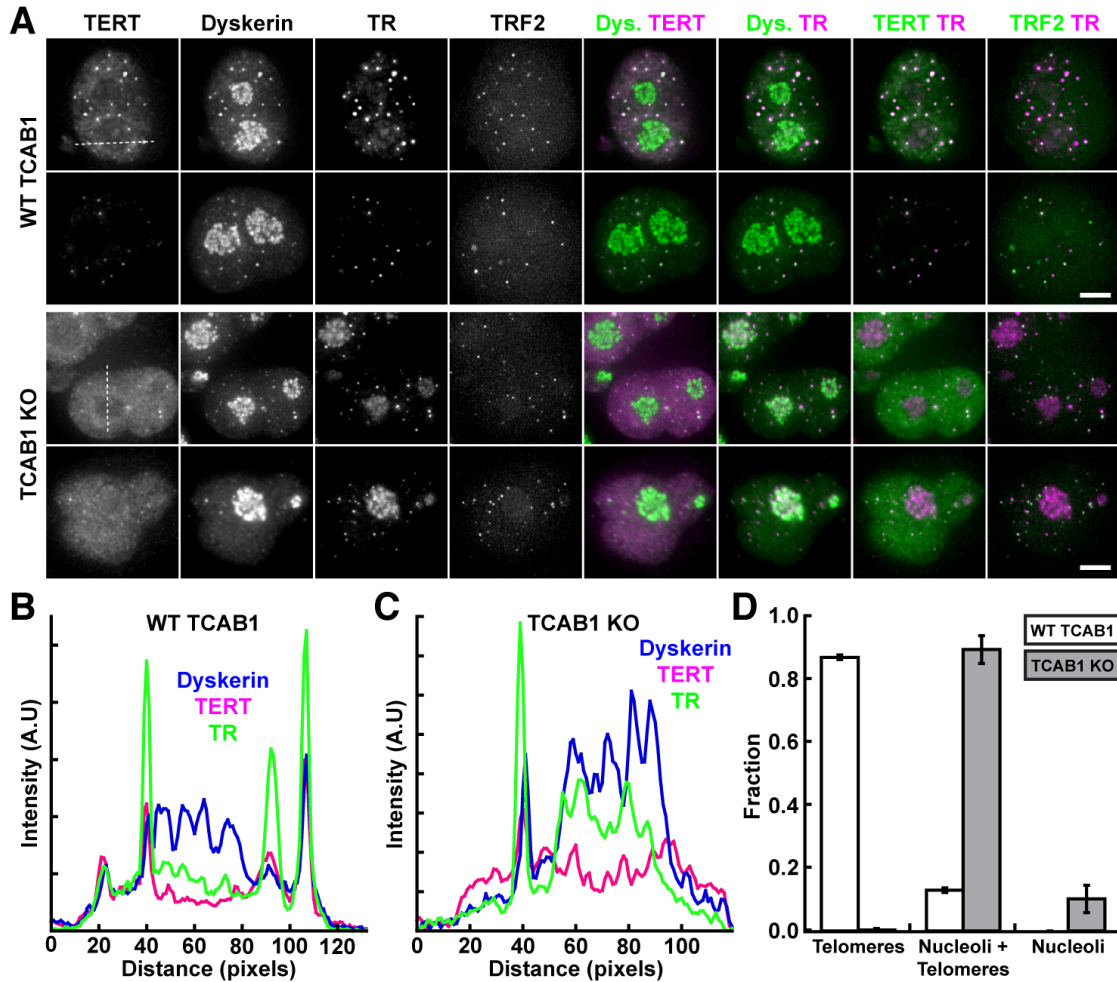

**Figure 3. TERT and TR localize to distinct nuclear compartments in TCAB1 knock-out cells. (A)** IF-FISH images of control and TCAB1 knock-out HeLa cells (3xFLAG-Halo-TERT, mEOS3.2-TRF2) overexpressing mCherry-TERT and TR (scale bar = 5  $\mu$ m). Cells were probed with antibodies against dyskerin and mCherry, and FISH probes specific to TR. The intrinsic fluorescence of mEOS3.2-TRF2 was used to detect telomeres. TR and TERT are co-localized at telomeres in control cells. In TCAB1 knock-out cells, TR is enriched in nucleoli, while TERT is depleted from nucleoli in both control and TCAB1 knock-out cells. Both TERT and TR also localize to telomeres in TCAB1 knock-out cells. **(B-C)** Line scans of **(B)** control and **(C)** TCAB1 knock-out cells along the dashed white lines in Fig. 3A, demonstrating the enrichment of TR (green) in nucleoli (blue) in TCAB1 knock-out cells and the depletion of TERT (magenta) from nucleoli in both control and TCAB1 knock-out cells. **(D)** Quantification of the fraction of cells showing TR localization exclusively to telomeres, to telomeres and nucleoli, or only to nucleoli in cells over-expressing mCherry-TERT and TR (3 independent experiments, >100 cells per experiments, mean  $\pm$  standard deviation).

176

177 in cells that lack TCAB1 (Fig. 3A,C-D). Similar TR localization patterns were found when  
 178 overexpressing untagged TERT and TR (Figure 3 – figure supplement 1) and untagged  
 179 TERT was excluded from nucleoli, confirming that nucleolar exclusion is an intrinsic  
 180 property of TERT (Figure 3 – figure supplement 1). Together these results demonstrate

181 that, when overexpressed in TCAB1 knock-out cells, TR is enriched in nucleoli and TERT  
182 is depleted from nucleoli, consistent with a failure of nucleolar TR to assemble with TERT.  
183 In addition, our observations suggest that overexpression can partially overcome the  
184 sequestration of TR in the nucleolus when TCAB1 is absent, allowing a fraction of TR to  
185 bind to TERT and localize to telomeres.

186

### 187 **TCAB1 promotes telomerase RNP assembly**

188 Previous studies by other laboratories have concluded that telomerase assembly is  
189 unaffected by the absence of TCAB1 and whether TCAB1 is required for telomerase  
190 activity is controversial (Chen et al., 2018; Venteicher et al., 2009; Vogan et al., 2016).  
191 To assess the role of TCAB1 in telomerase assembly, we immuno-purified endogenous  
192 telomerase using a well-established anti-TERT antibody (Cohen et al., 2007). The amount  
193 of TERT purified from TCAB1 knock-out cells was reduced compared to control cells  
194 (Figure 4A), which likely indicates a lower expression level of TERT in cells lacking  
195 TCAB1. In contrast, TR levels were not reduced in cells lacking TCAB1 (Figure 4B). To  
196 quantify telomerase assembly, we measured TERT levels by Western blot and  
197 determined the amount of TR co-purified using Northern blot (Fig. 4A,B). The fraction of  
198 TR associated with TERT was reduced to < 20% in TCAB1 knock-out cells compared to  
199 parental controls (Fig. 4C). In addition, the ratio of TR relative to TERT, which is a direct  
200 measure of telomerase assembly, was reduced to 20-40% in cells lacking TCAB1 relative  
201 to controls (Fig. 4D). This excludes the possibility that the lower amount of TR co-purified  
202 with TERT from TCAB1 knock-out cells is a consequence of the reduction of total TERT

203 immuno-precipitated from these cells (Fig. 4A). These observations strongly

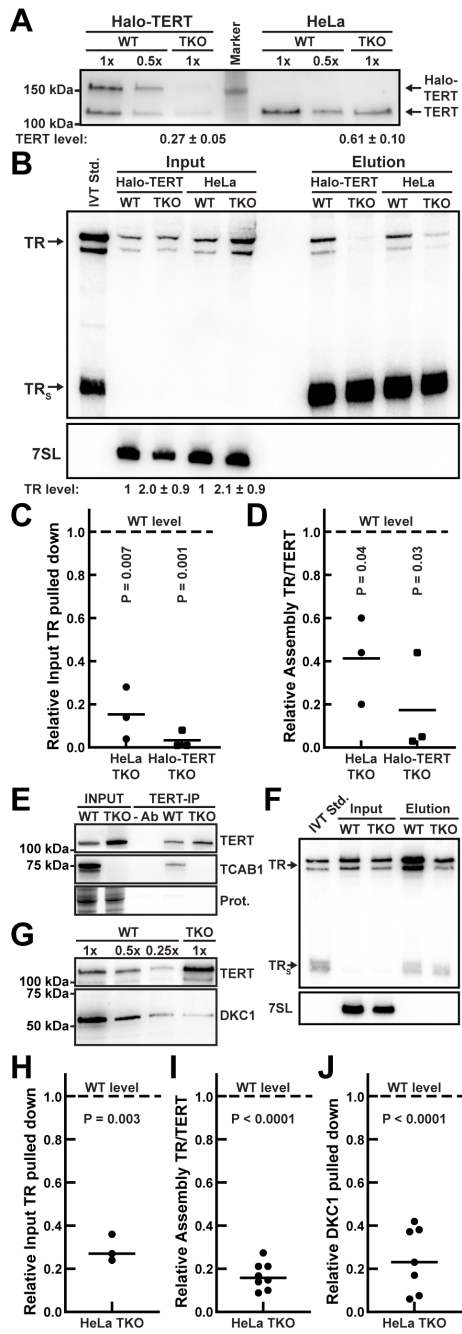

**Figure 4. Telomerase Assembly is reduced in the absence of TCAB1.** (A) Western blots analyzing endogenous TERT immuno-purification (using a sheep anti-TERT antibody) probed with a rabbit anti-TERT antibody (Abcam). TERT level normalized to WT (n = 3, SD). (B) Northern blot of RNA extracted from input and purified endogenous TERT samples probed with radiolabeled DNA oligonucleotides complementary to TR. Standards are *in vitro* transcribed full-length TR and truncated TR<sub>s</sub>. TR<sub>s</sub> was added to samples prior to RNA extraction as loading and recovery control. Input samples were also probed for 7SL RNA as loading control. Input TR levels relative to WT control normalized to 7SL RNA (n = 3, SD). (C-D) Quantification of the amount of (C) TR purified relative to input RNA levels, and (D) the ratio of TR relative to TERT in telomerase samples purified from TCAB1 knock-out cells compared to controls (n = 3, mean, T-Test). The dashed lines indicate the level in telomerase purified from wild-type TCAB1 cells which was normalized to 1.0. (E) Western blots analyzing TERT immuno-purification (using a sheep anti-TERT antibody) from control cells (WT) or TCAB1 knock-out cells (TKO) overexpressing TERT and TR probed with a rabbit anti-TERT antibody (Abcam) and a TCAB1 antibody. (F) Northern blot of RNA extracted from input and purified TERT samples from control cells (WT) or TCAB1 knock-out cells (TKO) overexpressing TERT and TR probed with radiolabeled DNA oligonucleotides complementary to TR. Standards are *in vitro* transcribed full-length TR and truncated TR<sub>s</sub>. TR<sub>s</sub> was added to samples prior to RNA extraction as loading and recovery control. Input samples were also probed for 7SL RNA as loading control. (G) Western blots to analyze immuno-purified telomerase RNP composition. A single membrane was cut into two pieces that were probed with TERT and dyskerin antibodies, respectively. (H-J) Quantification of the amount of (H) TR relative to input TR (n = 3), (I) the ratio of TR to TERT (n = 8), and (J) dyskerin (n = 7) in TERT purifications from TCAB1 knock-out cells overexpressing TERT and TR compared to parental controls (mean, T-Test). The dashed lines indicate the level in telomerase purified from wild-type TCAB1 cells which was normalized to 1.0.

204  
 205 suggest that telomerase assembly is defective in cells that lack TCAB1. To further test  
 206 this hypothesis, we overexpressed TERT and TR in parental and TCAB1 knock-out cells  
 207 and immuno-purified TERT with the same TERT antibody (Fig. 4E, Figure 4 - figure  
 208 supplement 1). After overexpression of TERT and TR, the fraction of TR associated with

209 TERT and the ratio of TR relative to TERT were significantly reduced when telomerase  
210 was purified from TCAB1 knock-out cells (Fig. 4E-F ,H-I , Figure 4 - figure supplement 1).  
211 Furthermore, the increased amount of telomerase purified after over expression allowed  
212 us to assess the amount of dyskerin associated with the telomerase RNP (Fig. 4G). Since  
213 TR bridges TERT and dyskerin, dyskerin co-purified with TERT directly reports on the  
214 presence of TR. Consistent with the reduction in TR, the amount of dyskerin bound to  
215 TERT was also reduced when TERT was purified from cells lacking TCAB1 compared to  
216 parental controls (Fig. 4G, H, Figure 4 - figure supplement 1). Importantly, we also  
217 confirmed that TCAB1 is absent from telomerase purified from TCAB1 knock-out cells  
218 (Fig. 4E, Figure 4 - figure supplement 1). Altogether, these results demonstrate that  
219 telomerase assembly is significantly reduced (to ~20-40% of control levels) in the  
220 absence of TCAB1 and that overexpression of TERT and TR is not sufficient to overcome  
221 this defect in telomerase RNP formation.

222

### 223 **TCAB1 is not required for telomerase catalytic activity**

224 To assess whether TCAB1 is required for telomerase catalysis, we first analyzed the  
225 enzymatic activity of endogenous telomerase purified from TCAB1 knock-out cells using  
226 the direct telomerase extension assays (Fig. 5A,B). Consistent with previous results  
227 (Chen et al., 2018), telomerase activity was strongly reduced in the absence of TCAB1  
228 (Fig. 5C). To address whether this reduction in telomerase activity was a consequence of  
229 the defect in telomerase assembly observed in TCAB1 knock-out cells, we determined  
230 the specific activity of telomerase by dividing the measured activity by the amount of TR

231 present in the respective telomerase sample. Due to the very small amount of TR

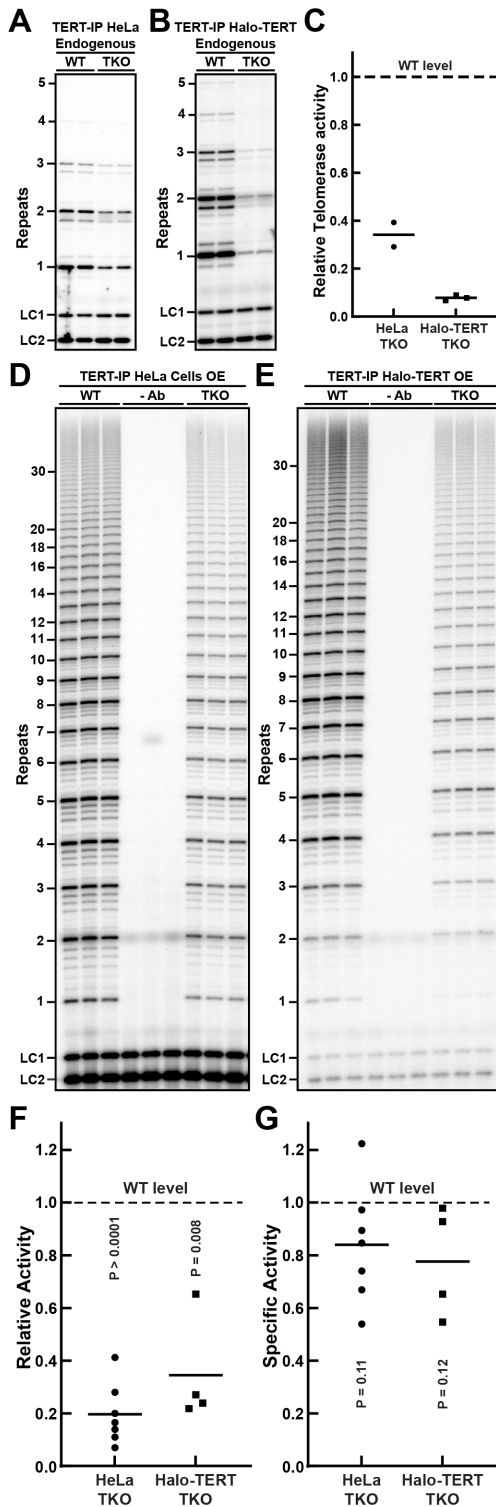

**Figure 5. The specific activity of telomerase is unchanged in the absence of TCAB1. (A-B)** Direct telomerase extension assay of endogenous telomerase immuno-purified from parental (WT) and TCAB1 knock-out (TKO) **(A)** HeLa and **(B)** Halo-TERT cell lines. Assays were carried out in the presence of 300 mM KCl and limiting amounts of dGTP. LC1 and LC2, radiolabeled DNA oligonucleotide loading controls. **(C)** Quantification of endogenous telomerase activity in samples from TCAB1 knock-out cells relative to parental controls (n = 3, mean). **(D-E)** Direct telomerase extension assay of overexpressed telomerase immuno-purified from parental (WT) and TCAB1 knock-out (TKO) **(D)** HeLa and **(E)** Halo-TERT cell lines. Assays were carried out in the presence of 150 mM KCl and 10  $\mu$ M dATP, dTTP, and dGTP. LC1 and LC2, radiolabeled DNA oligonucleotide loading controls. In -Ab samples the TERT antibody was omitted during the immuno-purification. **(F)** Quantification of overexpressed telomerase activity in samples from TCAB1 knock-out cells relative to parental controls (n = 4-7, mean). **(G)** Specific activity of overexpressed telomerase purified from TCAB1 knock-out cells relative to parental controls (n = 4-7, mean, T-Test). Specific activity was calculated by dividing the relative activity (see Fig. 5F) by the relative amount of TR present in immuno-purified TERT samples (Fig. 4F). The dashed lines indicate the activity level in telomerase purified from wild-type TCAB1 control cells which was normalized to 1.0.

232

233 detected in endogenous telomerase samples (Fig. 4B-C), quantifying differences in the

234 specific activity of endogenous telomerase was challenging. To overcome this limitation,

235 we determined the specific activity of telomerase purified from cells overexpressing TERT  
236 and TR. Similar to endogenous telomerase, activity of over-expressed telomerase purified  
237 from HeLa and Halo-TERT cells lacking TCAB1 was significantly reduced to 24% and  
238 34% compared to controls, respectively (Fig. 5D-F). The specific activity of over-  
239 expressed telomerase purified from HeLa and Halo-TERT cells lacking TCAB1 was  
240 slightly reduced (84% and 77% relative to control, respectively), but this reduction was  
241 not statistically significant (Fig. 5G). Together these observations demonstrate that  
242 cellular telomerase activity is reduced in the absence of TCAB1. Importantly, this  
243 reduction in catalytic activity corresponds closely to the reduction of telomerase assembly  
244 observed in TCAB1 knock-out cells, suggesting that the limited number of telomerase  
245 RNPs that form in the absence of TCAB1 are fully active.

246

### 247 **TCAB1 is required for telomerase assembly in living cells**

248 The experiments presented thus far demonstrate that telomerase assembly is reduced in  
249 the absence of TCAB1 but were carried out in fixed cells or cell lysates. To analyze  
250 telomerase assembly in intact cells, we carried out live cell single-molecule imaging of  
251 3xFLAG-HaloTag-TERT and determined the diffusion coefficient of TERT particles (Fig.  
252 6A, Movie 4, Figure 6 – figure supplement 1). The diffusion co-efficient is a measure of  
253 the rate of movement of a molecule and depends on the size of the complex it is part of  
254 and reports on molecular interactions formed with other sub-cellular structures. Analysis  
255 of the diffusion coefficients of TERT trajectories in control cells revealed three distinct  
256 populations of TERT particles (Fig. 6B-D). A static population ( $D_S = 0.03 \mu\text{m}^2/\text{s}$ , 12%)  
257 which likely represents assembled telomerase RNPs bound to telomeres, Cajal bodies or



258 other cellular structures, a slowly diffusion population ( $D_{F1} = 0.35 \mu\text{m}^2/\text{s}$ , 28%) and a  
259 rapidly diffusing population ( $D_{F2} = 1.54 \mu\text{m}^2/\text{s}$ , 60%). The slowly diffusing population likely  
260 includes assembled telomerase RNPs, while the rapidly diffusing particles represents  
261 TERT molecules, which are not assembled with TR (Fig. 6B). Importantly, these diffusion  
262 coefficients are largely consistent with our previous results using a distinct analytical  
263 method to determine their values (Schmidt et al., 2016). In the absence of TCAB1, the  
264 diffusion coefficient of the freely diffusing TERT population was increased ( $D_{F2} = 1.78 \pm$   
265  $0.04 \mu\text{m}^2/\text{s}$ , mean  $\pm$  SEM,  $p = 0.04$ , Fig. 6C) and the fraction of the TERT populations that  
266 includes assembled telomerase RNPs was significantly reduced ( $F_{\text{Slow+Static}} = 29 \pm 1\%$ ,  
267 mean  $\pm$  SEM,  $p = 0.02$ , Fig. 6D). This observation is consistent with our model that in the  
268 absence of TCAB1, telomerase assembly is defective. To confirm that the differences in  
269 TERT diffusion observed in TCAB1 knock-out cells were a consequences of a reduction  
270 in telomerase assembly, we knocked out TR, completely abolishing telomerase  
271 assembly. TR knock-out was confirmed by PCR and Sanger sequencing, FISH, and  
272 qPCR (Figure 6 – figure supplement 1). Similar to control cells and TCAB1 knock-out  
273 cells, TERT was also excluded from nucleoli in cells lacking TR (Figure 6 – figure  
274 supplement 1). Strikingly, the diffusion coefficients and the fraction of slow and static  
275 TERT particles in cells lacking TR closely resembled those of TCAB1 knock-out cells (Fig.  
276 6A-D, Figure 6 – figure supplement 1, Movie 4-5). It is important to note that, even in TR  
277 knock-out cells, 25-30% of TERT particles are slowly diffusing or static (Fig. 6D). Because  
278 TR is absent in these cells, the slowly diffusing and static TERT molecules must be the  
279 result of interactions of TERT with cellular structures other than Cajal bodies or telomeres.  
280 Due to this caveat, we don't believe it is appropriate to use these results to precisely

281 quantify the degree to which telomerase assembly is affected. The key observation in  
282 these experiments is that the changes in TERT diffusion observed in TCAB1 knock-out  
283 cells are identical to those observed in TR knock-out cells, which is consistent with a  
284 reduction in telomerase assembly when TCAB1 is absent.

285 To analyze the interaction of TERT with telomeres, we filtered out TERT  
286 trajectories that came into proximity with telomeres marked by mEOS3.2-TRF2, as  
287 previously described (Schmidt et al., 2016). To assess the interaction of TERT with  
288 telomeres, we plotted the step-size vs. the distance from the closest telomere for each  
289 step of these trajectories (Figure 6 – figure supplement 2). In control cells, we observed  
290 an enrichment of smaller step sizes and particles in close proximity to telomeres,  
291 consistent with TERT interactions with the telomere (Figure 6 – figure supplement 2). In  
292 contrast, TERT trajectories from TCAB1 knock-out cells lacked this enrichment, and the  
293 step size vs. distance from the closest telomere plots were identical to those from TR  
294 knock-out cells (Figure 6 – figure supplement 2). In addition, diffusion analysis using  
295 SpotOn revealed that the fraction of static TERT particles at telomeres was reduced from  
296 12% in control cells to 4-5% in TCAB1 and TR knock-out cells (Figure 6 – figure  
297 supplement 2). These observations indicate that in the absence of either TCAB1 or TR,  
298 stable interactions of telomerase with telomeres occur at a lower frequency because they  
299 require base pairing of TR with the chromosome end (Schmidt et al., 2018). Together  
300 these single-molecule imaging experiments demonstrate that in living cells telomerase  
301 assembly is strongly reduced in the absence of TCAB1.

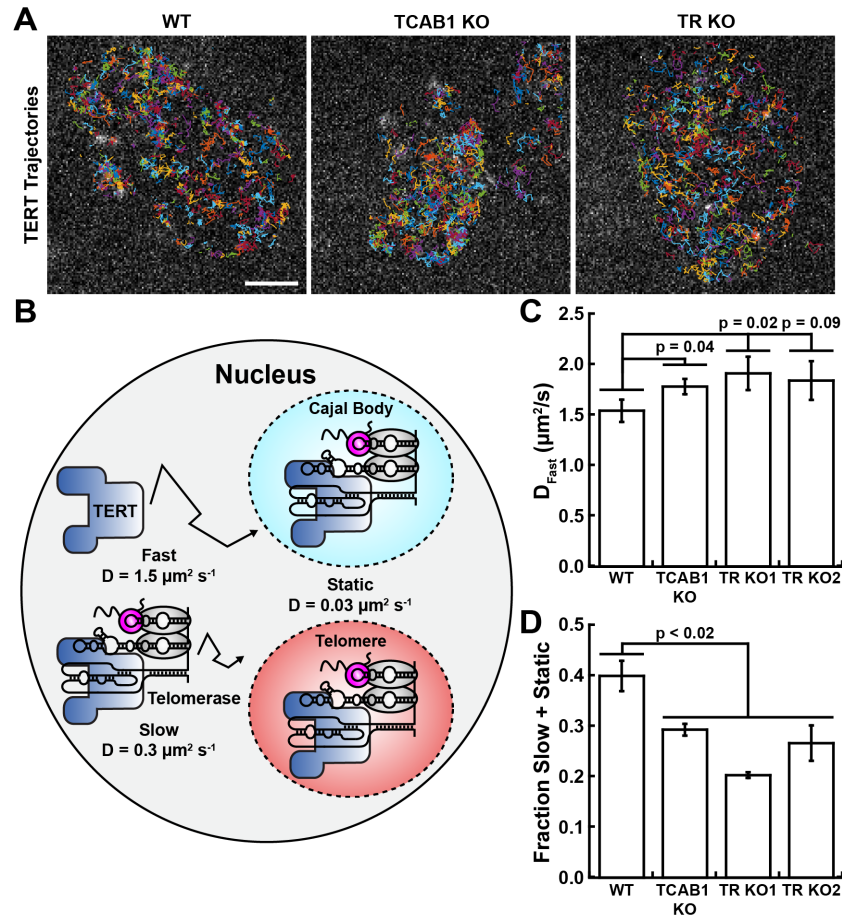

302

**Figure 6. Telomerase assembly is reduced in TCAB1 knock-out cells. (A)** TERT particle trajectories from control, TCAB1 knock-out, and TR knock-out cells expressing 3xFLAG-HaloTag TERT (JF646, scale bar = 2  $\mu\text{m}$ ). **(B)** Diagram of distinct populations of TERT particles detected in control cells. **(C)** Diffusion coefficient of the rapidly diffusing TERT population in control, TCAB1 knock-out, and TR knock-out cells (3 independent experiments, >15 cells per experiment per cell line, mean  $\pm$  standard deviation, T-Test, complete data in Fig. S6D). **(D)** Fraction of slow plus static TERT particles in control, TCAB1 knock-out, and TR knock-out cells expressing 3xFLAG-HaloTag TERT (3 independent experiments, >15 cells per experiment per cell line, mean  $\pm$  standard deviation, T-Test, complete data in Figure 6 – figure supplement 1).

303

### 304 Analysis of nucleolar snoRNP dynamics

305 The results presented thus far have demonstrated that TR accumulates in nucleoli in the  
 306 absence of TCAB1 but did not provide any insight into the dynamics of TR association  
 307 with the nucleolus. Since TR is targeted to nucleoli by dyskerin and other H/ACA RNP  
 308 components, we used dyskerin as a surrogate for TR and H/ACA snoRNPs in general.  
 309 We transiently expressed HaloTagged dyskerin in parental HeLa and TCAB1 knock-out

310 cells and analyzed dyskerin binding to the nucleolus using fluorescence recovery after  
311 photobleaching (FRAP). We identified cells with two clearly visible nucleoli, completely  
312 photo-bleached the dyskerin signal in one of the nucleoli and quantified the recovery of  
313 the fluorescence signal (Fig. 7A, Movies 6-7). The dyskerin signal recovered rapidly ( $t_{1/2}$   
314 = 28 s) but only ~65% of the signal was recovered after > 4 minutes (Fig. 7B-D, Movies  
315 6-7). This indicates that there are at least two distinct populations of dyskerin molecules  
316 in the nucleolus, a rapidly exchanging population and a static population that does not  
317 dissociate from the nucleolus over the time course of this experiment (Fig. 7D). The  
318 presence of a mobile dyskerin population was confirmed by analysis of the unbleached  
319 nucleolus, which lost fluorescence signal with similar kinetics (Fig. 7A, Figure 7 – figure  
320 supplement 1). Importantly, no significant difference in dyskerin dynamics were observed  
321 in TCAB1 knock-out cells compared to parental controls (Fig. 7A-D, Figure 7 – figure  
322 supplement 1). To further analyze the interaction of dyskerin with the nucleolus, we co-  
323 transfected cells with plasmids encoding HaloTagged dyskerin and GFP-NPM1 to mark  
324 nucleoli and carried out single-molecule live cell imaging (Fig. 7E, Movie 8). We observed  
325 both dynamic and highly static dyskerin molecules in the nucleolus (Fig. 7F, Movie 8).  
326 The step size distribution for all tracks was best fit with a three-state model (Figure 7 –  
327 figure supplement 1). Like TERT, these three states likely represent free dyskerin,  
328 dyskerin that is part of an H/ACA RNP, and dyskerin that is bound to nucleoli or Cajal  
329 bodies as part of an H/ACA RNP. To analyze dyskerin binding to the nucleolus we filtered  
330 out single-particle trajectories that overlapped with the GFP-NPM1 (Fig. 7F, Figure 7 –  
331 figure supplement 1). Consistent with the FRAP analysis, approximately one third of the

332 dyskerin molecules were statically associated with the nucleolus (Fig. 7F-G, Figure 7 –  
 333 figure supplement 1). We also confirmed that dyskerin molecules can be associated

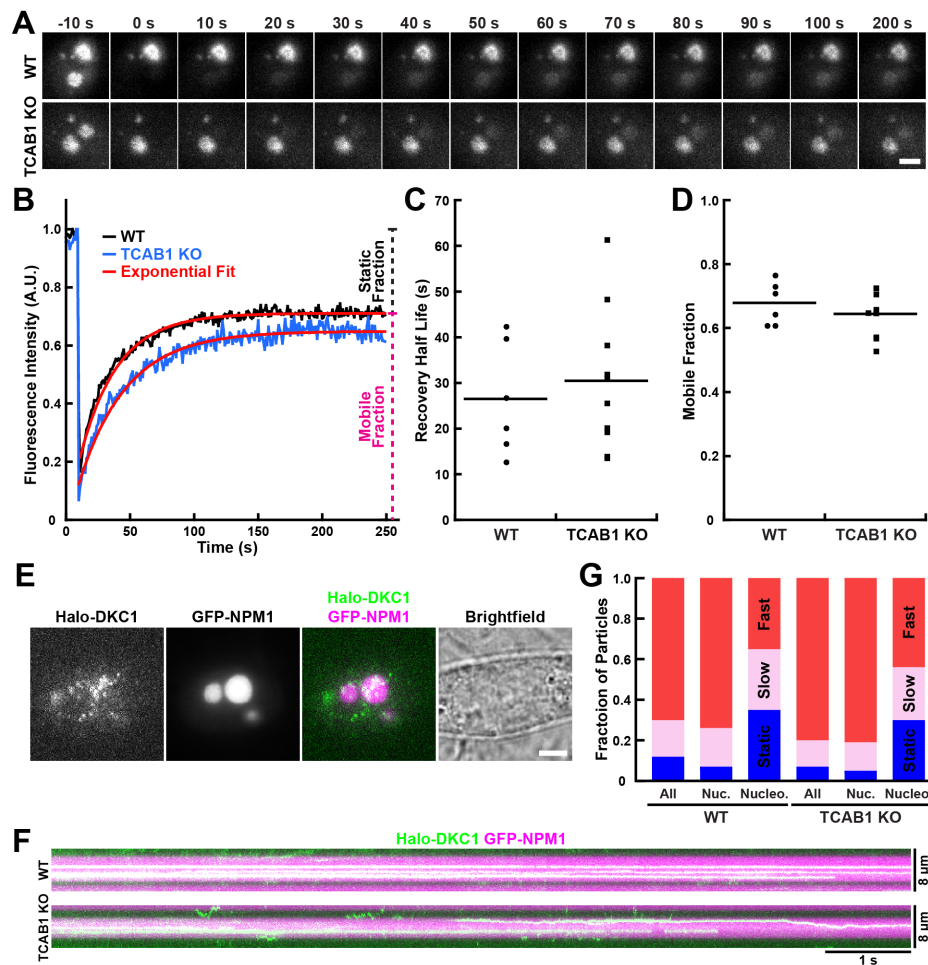

334

**Figure 7. Dyskerin exhibits dynamic and highly static binding to the nucleolus. (A)** Images of control and TCAB1 knock-out cells expressing 3xFLAG-HaloTag-dyskerin before and after photobleaching of nucleolar dyskerin (JFX650, scale bar = 5  $\mu$ m). **(B)** Fluorescence recovery curves of nucleolar dyskerin in control and TCAB1 knock-out cells. Data was fit with a single exponential function. **(C)** Quantification of half-life of fluorescence recovery, calculated from the rate constant of the single exponential fit of the data shown in Fig. 7B (n = 6 and 9, mean). **(D)** Quantification of the mobile fraction of nucleolar dyskerin based on the single exponential fit of the data shown in Fig. 7B (n = 6 and 9, mean). **(E)** Fluorescence images of single 3xFLAG-HaloTag-dyskerin particles, nucleoli marked by GFP-NPM1, and a widefield image of the imaged cell (scale bar = 5  $\mu$ m). **(F)** Kymographs of nucleolar 3xFLAG-HaloTag-dyskerin particles over time, demonstrating the presence of both static (straight lines) and mobile dyskerin molecules in control and TCAB1 knock-out cells. **(G)** Quantification of the fraction of fast diffusing, slow diffusing, and static 3xFLAG-HaloTag-dyskerin particles in the whole cell (All), nucleoplasm (Nuc.), and nucleolus (Nucleo.), based on Spot-On analysis (data histograms can be found in Figure 8 - figure supplement 1).

335 with the nucleolus for extended periods of time by reducing the imaging rate to 1 frame  
336 per second to avoid photobleaching (Figure 7 – figure supplement 1, Movie 9). Similar to  
337 the FRAP analysis, no significant difference in dyskerin dynamics were observed in  
338 TCAB1 knock-out cells compared to parental controls (Fig. 7E-G, Figure 7 – figure  
339 supplement 1). In total, this analysis demonstrates that approximately a third of the  
340 dyskerin containing H/ACA RNPs are tightly bound to the nucleolus and do not rapidly  
341 exchange with the nucleoplasm.

342

### 343 **TR is tightly associated with the nucleolus in absence of TCAB1**

344 Our observations demonstrate that dyskerin containing snoRNPs can be either tightly  
345 bound to the nucleolus or rapidly exchange with the nucleoplasm. To address whether  
346 TR is tightly bound to the nucleolus in the absence of TCAB1 we carried out cellular  
347 fractions to isolate nucleoli (Fig. 8, Figure 8 – figure supplement 1). Nucleoli were purified  
348 by rupturing isolated nuclei using sonication, followed by centrifugation through a high-  
349 density sucrose cushion (Figure 8 – figure supplement 1) (Lam and Lamond, 2006). If TR  
350 rapidly dissociated from the nucleolus ( $t_{1/2} = 28$  s), we would expect it to be lost from the  
351 nucleolar fraction during centrifugation through the sucrose cushion (10 min). In contrast,  
352 if TR was tightly bound to the nucleolus, it should be recovered in the nucleolar fraction.  
353 Isolated nucleoli were enriched with the nucleolar protein fibrillarin and the U3 snoRNA,  
354 while being depleted of lamin B1 and the 7SK RNA (Fig. 8A,B), which serve as  
355 nucleoplasmic markers, demonstrating that we successfully purified nucleoli using this  
356 approach. To determine the amount of TR found in the nucleolus and the nucleoplasm,  
357 we quantified the level of TR relative to that of the U3 or the 7SK RNA, respectively. In

358 control cells, the majority of TR was found in the nucleoplasmic fraction, and a small  
359 amount of TR was detected in nucleoli (Fig. 8B), consistent with previous work that  
360 analyzed TR localization by live cell imaging (Laprade et al., 2020). In contrast, in TCAB1  
361 knock-out cells TR was depleted from the nucleoplasm and enriched in the nucleolus (Fig.  
362 8B,C). To assess the impact that salt has on nucleolar integrity, we supplemented  
363 ruptured nuclei with potassium chloride, prior to isolating nucleoli by centrifugation. After  
364 exposure to a high salt concentration, fibrillarin and TR were found in the nucleoplasmic  
365 fraction instead of the nucleolar pellet (Figure 8 – figure supplement 1), demonstrating  
366 that nucleoli are disrupted and TR is released under these conditions. These observations  
367 confirm that TR is sequestered in the nucleolus in the absence of TCAB1 and strongly  
368 suggest that TR is tightly associated with the nucleolus under these circumstances,  
369 preventing it from entering the nucleoplasm to allow telomerase assembly.

370

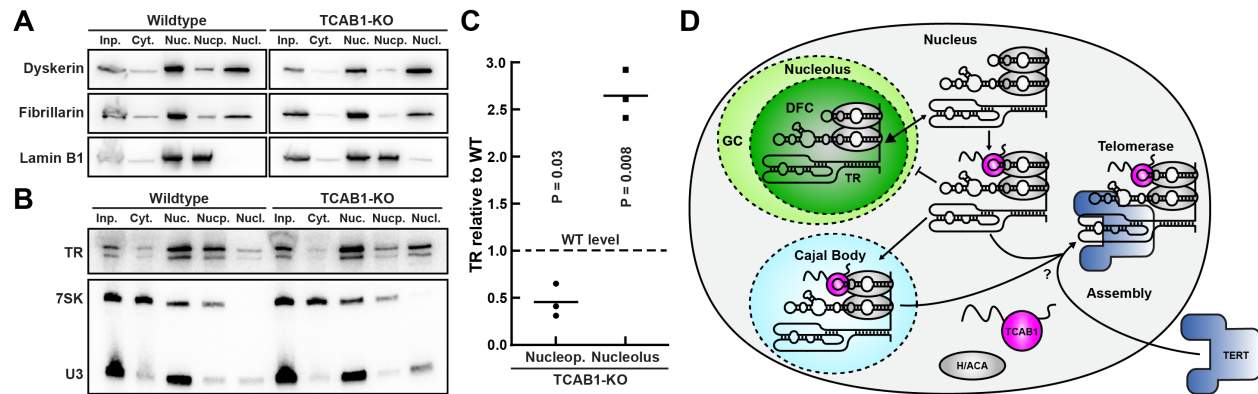

**Figure 8. The telomerase RNA is enriched in and tightly bound to the nucleolus. (A)** Western blots of samples of cellular fractionation experiments (Input, Cytoplasm, Nucleus, Nucleoplasm, Nucleolus, left to right) from control and TCAB1 knock-out cells. Blots were probed with antibodies against dyskerin, fibrillarin (nucleolar marker), and lamin B1 (nucleoplasmic marker). **(B)** Northern blots of samples of cellular fractionation experiments (Input, Cytoplasm, Nucleus, Nucleoplasm, Nucleolus, left to right) from control and TCAB1 knock-out cells. Blots were first probed with radiolabeled DNA oligonucleotides complementary to TR, followed by probes complementary to the 7SK RNA (nucleoplasmic marker) and the U3 snoRNA (nucleolar marker). **(C)** Quantification of the nucleoplasmic and nucleolar abundance of TR in TCAB1 knock-out cells relative to control cells. Nucleoplasmic TR signal was normalized to the 7SK RNA signal and nucleolar TR signal was normalized to the U3 RNA signal (n = 3, mean, T-Test). **(D)** Model for the regulation of telomerase assembly by TCAB1. In the absence of TCAB1, TR is sequestered in the dense fibrillar component (DFC) of the nucleolus, which is separated from the nucleoplasm by the granular component (GC) of the nucleolus.

371



## 372 **Discussion**

373 The experiments described in this study demonstrate that TCAB1 promotes telomerase  
374 assembly. In the absence of TCAB1 the telomerase RNA is targeted to the nucleolus via  
375 its association with dyskerin and other components of the H/ACA complex. In contrast to  
376 TR, TERT cannot enter the nucleolus, preventing its association with TR in cells that lack  
377 TCAB1. This demonstrates that nuclear compartmentalization, which is a consequence  
378 of nucleolar phase separation, counteracts telomerase assembly. In addition, we  
379 demonstrate that sequestration of TR in the phase-separated nucleolus in the absence  
380 of TCAB1 can be partially overcome by telomerase overexpression, leading to telomerase  
381 assembly and localization to telomeres. This suggests that the nucleolus has a limited  
382 capacity to accommodate cellular RNAs and that TCAB1 is not necessary for telomerase  
383 recruitment to telomeres. Our analysis of dyskerin bound snoRNP dynamics in nucleoli  
384 revealed that a third of these snoRNPs are tightly associated with the nucleolus and that  
385 TR is likely included in this fraction. Finally, we demonstrate that while telomerase  
386 assembly is limited the specific activity of telomerase is unchanged in the absence of  
387 TCAB1, which excludes a role of TCAB1 in telomerase catalytic function. Altogether our  
388 work completely reshapes our understanding of the role of TCAB1 in telomerase function  
389 in human cells and provides insight into the role phase-separated organelles play in RNP  
390 assembly and function.

391

## 392 **TCAB1 promotes telomerase assembly**

393 The importance of TCAB1 for telomere maintenance is undisputed (Chen et al., 2018;  
394 Venteicher et al., 2009). Knock-out or depletion of TCAB1 results in telomere shortening

395 (Chen et al., 2018; Venteicher et al., 2009; Vogan et al., 2016). All previous work also  
396 concluded that TR is enriched in the nucleolus in the absence of TCAB1 (Chen et al.,  
397 2018; Stern et al., 2012; Vogan et al., 2016; Zhong et al., 2011). Finally, all prior studies  
398 propose that TCAB1 is not required for telomerase assembly but instead plays a role  
399 telomerase trafficking to Cajal bodies and telomeres or is required for telomerase  
400 catalysis (Chen et al., 2018; Stern et al., 2012; Venteicher et al., 2009; Vogan et al., 2016;  
401 Zhong et al., 2011). In contrast, our results demonstrate that in the absence of TCAB1,  
402 TERT and TR are localized to the distinct sub-cellular compartments, the nucleoplasm  
403 and the nucleolus, respectively. This spatial separation strongly reduces telomerase  
404 assembly, which leads to reduced number of telomerase RNPs per cell and in turn  
405 telomere shortening. Importantly, in the absence of TCAB1, telomerase assembly is  
406 reduced but not completely abolished. It is likely that TR bound by the H/ACA complex is  
407 in an equilibrium between localizing to nucleoplasm and the nucleolus. In the presence  
408 of TCAB1, this equilibrium is shifted towards the nucleoplasm because TCAB1 prevents  
409 the entry of TR into the nucleolus (Fig. 8D). In contrast, in the absence of TCAB1, the  
410 majority of TR is trapped in the nucleolus effectively reducing the amount of TR that is  
411 available for assembly with TERT.

412 The sub-cellular location and order in which telomerase RNP components  
413 associate with TR in human cells are largely unknown (Fig. 8D). Our results exclude the  
414 possibility that TERT assembles with TR in the nucleolus, and results by others have  
415 demonstrated that eliminating Cajal bodies does not impact telomerase activity or  
416 telomere maintenance, suggesting that Cajal bodies are not necessary for telomerase  
417 assembly (Chen et al., 2018; Vogan et al., 2016). Our single-molecule live cell imaging of

418 TERT has demonstrated that TERT is almost exclusively localized to the nucleus, it is  
419 therefore likely that human telomerase assembles in the nucleoplasm. But it cannot be  
420 ruled out that in human cells TR is transiently exported to the cytoplasm to assemble with  
421 nascent TERT protein, as is the case in *S. cerevisiae* (Gallardo et al., 2008). Interestingly,  
422 our results suggest that TERT levels are reduced in the absence of TCAB1. It is possible  
423 that TERT protein which fails to assemble with TR is degraded, which could be an  
424 important mechanism controlling telomerase abundance.

425 Altogether, our observations support our model that TCAB1 promotes telomerase  
426 assembly by counteracting TR accumulation in the nucleolus to facilitate its assembly  
427 with TERT. Our model is further supported by work from Vogan *et al.*, which demonstrated  
428 that truncated TR (hTRmin) that lacks the H/ACA region and therefore cannot bind  
429 dyskerin, accumulates in the nucleoplasm and is excluded from nucleoli (Vogan et al.,  
430 2016). Importantly, in cells that express hTRmin, TCAB1 is not required for telomere  
431 maintenance (Vogan et al., 2016), consistent with TCAB1 promoting telomerase  
432 assembly by preventing TR accumulation in the nucleolus.

433

#### 434 **TCAB1 is not required for telomerase catalysis**

435 Previous work by others has reported conflicting results regarding the role of TCAB1 in  
436 telomerase catalysis, ranging from full enzymatic activity in initial reports to substantial  
437 activity defects in the most recent study (Chen et al., 2018; Venteicher et al., 2009; Vogan  
438 et al., 2016). Importantly, both our work and the only other study that analyzed the role of  
439 TCAB1 in telomerase activity using the “gold-standard” direct telomerase extension assay  
440 concluded that telomerase activity is significantly reduced in the absence of TCAB1.

441 While both studies concur on the degree to which telomerase activity is reduced in the  
442 absence of TCAB1, the proposed underlying molecular mechanisms differ. Chen *et al.*  
443 propose that TCAB1 is required for proper folding of the CR4/CR5 region of the  
444 telomerase RNA, which directly associates with TERT, without affecting telomerase  
445 assembly (Chen et al., 2018). Recent structural analysis of the telomerase RNP from  
446 human cells revealed that TCAB1 is located far away from the CR4/CR5 region of TR  
447 (Figure 8 – figure supplement 1) (Ghanim et al., 2021). Although it is possible that  
448 telomerase can adopt additional conformations, based on the currently available  
449 structural information it is difficult to rationalize a molecular mechanism by which TCAB1  
450 could specifically promote CR4/CR5 folding. In addition, due to the miss-folding of TR  
451 telomerase was proposed to adopt a low activity state in the absence of TCAB1.  
452 Experimentally such a low activity state would manifest itself as a reduction in the specific  
453 activity of telomerase (telomerase activity per assembled telomerase RNP). Our  
454 experiments strongly suggest that, while telomerase assembly is reduced in the absence  
455 of TCAB1, the limited amount of telomerase that can assemble is close to fully active (i.e.  
456 does not have reduced specific activity). One possible explanation for the discrepancies  
457 between the work by Chen *et al.* and our study is the methodology used to generate cell  
458 lysates. Our results demonstrate that the high salt concentration used by Chen *et al.* to  
459 generate nucleolar extracts dissolves nucleoli and releases TR. Consistent with this  
460 observation, salt concentrations > 250 mM have been shown to disrupt the phase  
461 separation phenomena underlying the formation of the nucleolus (Feric et al., 2016).  
462 Solubilization of the nucleolus and release of TR would override the localization of TR  
463 and TERT to distinct sub-cellular compartments, and could allow telomerase to assemble

464 in the nuclear extract, while it is limited in cells or cell lysates in which nucleoli remain  
465 intact. Altogether, our enzymatic analysis, and the positioning of TCAB1 within the  
466 telomerase RNP do not support a role of TCAB1 in TR folding and telomerase catalysis  
467 but are fully consistent with TCAB1 promoting telomerase assembly.

468

#### 469 **TCAB1 is not necessary for telomerase recruitment to telomeres**

470 TCAB1 is necessary for the localization of scaRNAs to Cajal bodies and previous work  
471 suggested that it is also required for telomerase recruitment to telomeres (Stern et al.,  
472 2012; Venteicher et al., 2009). Our observations demonstrate that when TERT and TR  
473 are overexpressed in TCAB1 knock-out cells a fraction of TERT can assemble with TR  
474 and localize to telomeres. Telomerase recruitment to telomeres requires a direct interaction  
475 between TERT and TPP1 (Nandakumar et al., 2012; Schmidt et al., 2014; Zhong et al.,  
476 2012), therefore TR that localizes to telomeres must be assembled with TERT. These  
477 results are fully consistent with our model that the spatial separation of TR and TERT in  
478 the absence of TCAB1 prevents telomerase assembly. When TR is overexpressed the  
479 capacity of the nucleolus to sequester TR may be saturated and excess TR can assemble  
480 with TERT and localize to telomeres. In addition, our observations suggests that TCAB1  
481 is not necessary for telomerase localization to telomeres. Because telomerase was  
482 overexpressed in these experiments, we cannot exclude the possibility that TCAB1  
483 contributes to telomerase recruitment to telomeres at endogenous expression levels. But  
484 the maintenance of telomeres at a short length in TCAB1 knock-out cells suggests that  
485 telomerase recruitment to telomeres can occur in the absence of TCAB1.

486

## 487 **Regulation of RNP assembly by nucleolar phase-separation**

488 In addition to the mechanistic insight into the role of TCAB1 in telomerase function, our  
489 results also demonstrate that nucleolar phase separation can effectively regulate  
490 telomerase RNP assembly in the nucleus of human cells. How RNA molecules are  
491 specifically recruited into, excluded from, or expelled from non-membrane bound  
492 organelles is a key unanswered question. One model suggests that gradual replacement  
493 of non-specific, multivalent interactions of pre-ribosomal RNAs with nucleolar proteins  
494 such as NPM1 and fibrillarin, with specific, high-affinity interactions with ribosomal  
495 proteins leads to the ejection of mature ribosomal subunits from the nucleolus (Riback et  
496 al., 2020). In this model a key driving force for the retention of RNA in the nucleolus is  
497 regions of RNA not yet bound by ribosomal proteins, that are available to interact with  
498 nucleolar proteins (Riback et al., 2020). By analogy, this model would explain why TR  
499 bound by the H/ACA complex but not associated with TERT would be sequestered in the  
500 nucleolus. In addition to the interactions formed by the H/ACA complex with nucleolar  
501 proteins and RNA, the regions of TR that are bound by TERT in the context of telomerase  
502 (i.e. the pseudoknot, template, and CR4/CR5) would be available to form non-specific,  
503 multivalent interactions with nucleolar proteins to strengthen the association of TR with  
504 the nucleolus and prevent its release.

505 TR is a unique among the scaRNAs because it contains the additional domains  
506 that associate with TERT. Most other box H/ACA scaRNAs are substantially shorter (<150  
507 nucleotides) than TR (451 nucleotides), and do not contain large regions that are not  
508 bound by proteins and could form non-specific interactions with nucleolar proteins. It is  
509 therefore possible, that in cells lacking TCAB1, TR is strongly retained in the nucleolus

510 while other scaRNAs are less tightly bound, because they lack additional interaction sites  
511 with nucleolar proteins. Consistent with this hypothesis, we observe multiple populations  
512 of dyskerin with distinct binding dynamics in nucleoli. The weakly bound population could  
513 include dyskerin bound to scaRNAs, that are not retained in the nucleolus because their  
514 RNA targets, which would provide an additional interaction site, are not present in  
515 nucleoli. In contrast, dyskerin bound to snoRNAs would strongly associate with the  
516 nucleolus because they also bind to their target RNAs. This provides a potential  
517 explanation for the phenotypes observed in patients with TCAB1 mutations that suffer  
518 from dyskeratosis congenita. The patients have a clear deficiency in telomerase function  
519 (Zhong et al., 2011), but no defects in splicing have been reported, which would be the  
520 consequence of complete loss of scaRNA function and their critical role in spliceosome  
521 maturation.

522         How TCAB1 binding leads to the exclusion of TR and other scaRNA from the  
523 nucleolus remains a key unanswered question. TCAB1 interacts with a very short  
524 sequence motif in TR, which is far removed from the TR regions that associate with TERT  
525 (Fig. 8 – Figure supplement 1) (Ghanim et al., 2021). It is therefore unlikely that TCAB1  
526 binding leads to expulsion of TR from the nucleolus by reducing the number of non-  
527 specific, multivalent interactions TR can form with nucleolar proteins. As outlined above,  
528 we believe that TCAB1 prevents localization of scaRNAs to the nucleolus, rather than  
529 extracting scaRNAs that are already localized to the DFC. One potential explanation is  
530 that TCAB1 counteracts scaRNA recruitment to the nucleolus by inhibiting the nucleolar  
531 localization signals within dyskerin (Heiss et al., 1999). Dissecting the molecular  
532 mechanism by which TCAB1 leads to exclusion of TR from the nucleolus in future studies

533 will undoubtedly shed light on the fundamental principles RNP recruitment to non-  
534 membrane bound organelles and its physiological role in cell biology.

535



536 **Acknowledgements**

537 We would like to thank members of the Schmidt lab and J. Nandakumar for discussions  
538 and critical reading of the manuscript and Luke Lavis (HHMI Janelia Research Campus)  
539 for providing HaloTag dyes. This work was supported by grants from the NIH (R00  
540 GM120386, R01GM141354) to J.C.S.. J.C.S. was a Damon Runyon Dale F. Frey  
541 Scientist supported (in part) by the Damon Runyon Cancer Research Foundation (DFS-  
542 24-17). S.B.C. acknowledges sustained support from the Ernest & Pirooska Major  
543 Foundation.

544

545 **Author contributions**

546 B.S.A.-M. carried out IF-FISH experiments, telomerase purifications, cellular  
547 fractionations, analyzed telomerase assembly, generated mCherry- and 3xFLAG-  
548 HaloTag-dyskerin plasmids, determined their sub-cellular localization, and edited the  
549 manuscript. G.I.P. maintained cell lines, established TCAB1 and TR knock-out cell lines  
550 and carried out IF-FISH experiments. K.A.-B. assisted in establishing the TR knock-out  
551 cell line and carried out characterization of the TR knock-out cells. S.B.C. purified and  
552 characterized the anti-TERT sheep antibody. L.H. and K.Y. characterized TCAB1 knock-  
553 out clones using Southern blots. J.C.S. carried out all other experiments, designed the  
554 research, analyzed data, and wrote the manuscript.

555

556 **Competing interests**

557 The authors declare no competing interests.

## 558 **Materials and Methods**

### 559 **Cell Lines and Tissue Culture**

560 All cell lines were based on HeLa-EM2-11ht (Weidenfeld et al., 2009) and were cultured  
561 in Dulbecco's Modified Eagle Medium including L-glutamine (Gibco) supplemented with  
562 10% fetal bovine serum, 100 units/ml penicillin and 100 µg/ml streptomycin at 37°C with  
563 5% CO<sub>2</sub>. Live cell imaging was carried out using CO<sub>2</sub> independent media supplemented  
564 with 2 mM GlutaMAX (Life Technologies), 10% fetal bovine serum, 100 units/ml penicillin  
565 and 100 µg/ml streptomycin at 37°C with 5% CO<sub>2</sub>. For single-molecule imaging of  
566 HaloTag-TERT cell were cultured in homemade imaging dishes made by gluing 22x22  
567 mm Nexterion coverslips (170 ± 5 µm, Schott) onto the bottom of plastic 3.5 x 1.0 cm cell  
568 culture dishes with a hole in the middle using an epoxy adhesive. Prior to chamber  
569 assembly the coverslips were washed with 1 M KOH and 100% for 30 min each in a  
570 sonicating water bath. To enrich for cells in S-phase for live cell imaging experiments,  
571 cultures we treated with complete media including 2 mM thymidine for a minimum of 16  
572 hours. Cells were released 2 hours prior to imaging by replacing the thymidine containing  
573 media with fresh media without thymidine. Puromycin selection was carried out at a  
574 concentration of 1 µg/ml.

575

### 576 **Plasmid Construction and Genome Editing**

577 All plasmids were generated by Gibson assembly (NEB) using standard protocols or by  
578 inverse PCR. All plasmids will be made available on Addgene. All Cas9 and sgRNA  
579 expression plasmids were based on pX330 (Cong et al., 2013). The homologous  
580 recombination donor for the TR knock-out was generated by assembling the genomic

581 sequences immediately upstream and downstream (~500 bp each) of the TR sequence  
582 flanking a puromycin resistance cassette into HpaI linearized pFastBac. The 3xFLAG-  
583 HaloTag-NLS plasmids was generated by adding a 3xFLAG-tag to a previously described  
584 HaloTag-NLS plasmid (a kind gift from X. Darzacq and A. Hansen) (Hansen et al., 2018).  
585 The 3xFLAG-HaloTag-dyskerin plasmid was generated by replacing TERT in our  
586 previously described 3xFLAG-HaloTag-TERT expression plasmid with the dyskerin  
587 coding sequence (Schmidt et al., 2016). The mCherry-dyskerin plasmid was generated  
588 by replacing TERT in our previously described mCherry-TERT expression plasmid with  
589 the dyskerin coding sequence (Schmidt et al., 2014). Unless otherwise stated  
590 transfections were carried out using Lipfectamine 2000 (Invitrogen) using the  
591 manufacturer's instructions. For FRAP analysis of dyskerin  $1 \times 10^6$  HeLa cells were  
592 transfected with 1  $\mu$ g of 3xFLAG-HaloTag-dyskerin plasmid using the Lonza 4D-  
593 Nucleofector with the SE Cell Line 4D-Nucleofector X kit (Cat. V4XC-1012) and program  
594 CN-114. For single-molecule imaging of dyskerin 1  $\mu$ g of a GFP-NPM1 plasmid was  
595 included in addition to the 1  $\mu$ g of 3xFLAG-HaloTag-dyskerin plasmid. GFP-NPM1 WT  
596 was a gift from Xin Wang (Addgene plasmid #17578; <http://n2t.net/addgene:17578>;  
597 RRID:Addgene\_17578) (Wang et al., 2005). TCAB1 was knocked-out using a single  
598 sgRNA or two separate sgRNA and Cas9 encoding plasmids that were transfected  
599 alongside a GFP-expression plasmid. 24 hours after transfection single-cell clones were  
600 sorted using the GFP signal. TCAB1 knock-out clones were screened by PCR and  
601 confirmed by western blot, Southern Blotting of the *TCAB1* locus and  
602 immunofluorescence imaging. TR was knocked out by transfecting two sgRNA plasmids  
603 and a homologous recombination donor plasmid. 48 hours after transfection puromycin

604 selection was initiated and 1 week after the initiation of selection single-cell clones were  
605 generated by dilution into 96-well plates. TR knock-out was confirmed using PCR and  
606 Sanger sequencing, fluorescence *in situ* hybridization, and RT-qPCR.

607

### 608 **Immunofluorescence and Fluorescence *In Situ* Hybridization Imaging**

609 Fixed cell immunofluorescence imaging and fluorescence *in situ* hybridization was carried  
610 out as previously described (Schmidt et al., 2014). Briefly, cells grown on coverslips were  
611 fixed in PBS supplemented with 4% formaldehyde. When using the HaloTag for  
612 fluorescence detection cells were incubated with 100 nM of JF646 HaloTag-ligand for 30  
613 min prior to fixation. Unincorporated ligand was removed by 3 washes with complete  
614 media followed by placing the cells back in the incubator for 10 min to let additional dye  
615 leak out of the cells. mEOS3.2-TRF2 was detected using the intrinsic fluorescence of  
616 green form of mEOS3.2. After removing the fixation solution using 2 PBS washes,  
617 coverslips were transferred into aluminum foil covered humidity chambers with a parafilm  
618 layer and rinsed with 1 ml of PBS with 0.2% Triton X-100. Cells were then incubated in  
619 blocking buffer (PBS, 0.2% Triton X-100, 3% BSA) for 30 minutes, followed by incubation  
620 with primary antibodies diluted in blocking buffer for 1 hour. All primary antibodies were  
621 used at a concentration of 1 µg/ml. After three washes with PBS + 0.2% Triton X-100,  
622 coverslips were incubated with secondary antibodies diluted in PBS + 0.2% Triton X-100  
623 for 1 hour. All secondary antibodies were used at a concentration of 4 µg/ml. Cells were  
624 washed three times PBS + 0.2% Triton X-100 prior to a second fixation with PBS + 4%  
625 formaldehyde. In cases where nuclear staining was used the first of the three washing  
626 steps also included 0.1 µg/ml HOECHST. After the second fixation steps coverslips were

627 dehydrates in three steps with ethanol (70%, 95%, 100%), re-hydrated in 2xSSC + 50%  
628 formamide, blocked for 1 hour in hybridization buffer (100 mg/ml dextran sulfate, 0.125  
629 mg/ml *E. coli* tRNA, 1 mg/ml nuclease free BSA, 0.5 mg/ml salmon sperm DNA, 1 mM  
630 vanadyl ribonucleoside complexes, 50% formamide, 2xSSC) at 37°C, before incubating  
631 the coverslips in hybridization buffer supplemented with three TR probes (30 ng per  
632 coverslip,

633 /5Cy5/GCTGACATTTTTTGTGGCTCTAGAATGAACGGTGGGAAGGCGGCAGGCCGA  
634 GGCTT,

635 /5Cy5/CTCCGTTCTTCTTCTGCGGCCTGAAAGGCCTGAACCTCGCCCTCGCCCC  
636 GAGAG,

637 /5Cy5/ATGTGTGAGCCGAGTCCTGGGTGCACGTCCCACAGCTCAGGGAATCGCGC  
638 CGCGCGC) over night at 37°C. Probe sequences were previously described (Tomlinson  
639 et al., 2006). After hybridization coverslips were washed twice for 30 minutes in 2xSSC +  
640 50% formamide and then mounted on slides using ProLong Antifade Diamond mounting  
641 media (Life Technologies). Microscopy was carried out using a DeltaVision Elite  
642 microscope using a 60x PlanApo objective (1.42 NA) and a pco.edge sCMOS camera.  
643 We acquired 20 Z-sections spaced by 0.2  $\mu\text{m}$ , followed by image deconvolution and  
644 maximum intensity projection of the sections using the DeltaVision Softworx software.

645

### 646 **Single-Molecule Live Cell Imaging**

647 Live cell single-molecule imaging was carried out on a Olympus IX83 inverted microscope  
648 equipped with a 4-line cellTIRF illuminator (405 nm, 488 nm, 561 nm, 640 nm lasers), an  
649 Excelitas X-Cite TURBO LED light source, a Olympus UAPO 100x TIRF objective (1.49

650 NA), a CAIRN TwinCam beamsplitter, 2 Andor iXon 897 Ultra EMCCD cameras, a  
651 cellFRAP with a 100 mW 405 nm laser, and a blacked-out environmental control  
652 enclosure. The microscope was operated using the Olympus cellSense software.  
653 3xFLAG-HaloTag-TERT was labeled for 2 min in complete media supplemented with 100  
654 nM JF646-HaloTag ligand (Grimm et al., 2015). After removing the HaloTag-ligand with  
655 three washes in complete media, cells were placed back in the incubator for 10 min to  
656 allow unincorporated dye to leak out of the cells. Cells were then transferred into CO<sub>2</sub>  
657 independent media and put on the microscope which was heated to 37°C. Single-  
658 molecule imaging was carried out at 50 or 100 frames per second using highly inclined  
659 laminated optical sheet illumination (Tokunaga et al., 2008). Movies were typically 20  
660 seconds in length (2000 frames) and were followed by a transmitted light acquisition to  
661 visualize overall cell morphology.

662 For single-molecule imaging of 3xFLAG-HaloTag-Dyskerin, cells were labeled with 100  
663 pM of JFX650-HaloTag Ligand (Grimm et al., 2020) for 1 min. Imaging was carried out at  
664 100 frames per second and images of GFP-NPM1 were taken before and after single-  
665 molecule movies of dyskerin to assure the position of the nucleolus had not shifted.

666

## 667 **RT-qPCR**

668 RNA samples for RT-qPCR analysis were generated by using RNeasy Mini kits (Qiagen)  
669 using ~2 million cells as starting material. Reverse transcription was carried out using  
670 random hexamer primers and SuperScript III reverse transcriptase (Invitrogen) according  
671 to the manufacturer's instructions. qPCR was carried out using the Maxima SYBR Green  
672 qPCR master mix (Thermo Scientific) using primers for GAPDH and TR according to the

673 manufacturer's instructions. All qPCR reactions were carried out in triplicates and three  
674 independent biological replicates were analyzed.

675

### 676 **Southern Blotting**

677 Southern blotting was carried out using standard protocols (Southern, 2006). Briefly,  
678 genomic DNA generated by phenol-chloroform extraction after cell lysis using TE  
679 supplemented with 0.5% SDS and 0.1 mg/ml Proteinase K, was digested with BamHI  
680 (generating a 1394 bp fragment spanning exons 1-3 of the *TCAB1* locus) and separated  
681 on a 0.8% agarose gel. The DNA was then transferred on a Hybond-N+ nylon membrane  
682 using capillary transfer. The *TCAB1* locus was detected using radioactive probes (alpha-  
683 <sup>32</sup>P-dCTP) generated by randomly primed DNA synthesis using an 800 bp PCR product  
684 overlapping with the 1394 bp restriction fragment as a template and Klenow polymerase  
685 (NEB). Telomeric restriction fragment analysis was carried out as previously described  
686 (Nandakumar et al., 2012).

687

### 688 **Western Blotting**

689 Mini-PROTEAN TGX stain-free gels (Bio-Rad) were used for SDS-PAGE. Total protein  
690 was detected using a ChemiDoc MP (Bio-Rad) after a 45 second UV activation. Western  
691 transfer was carried out using the Trans-Blot Turbo transfer system (Bio-Rad) according  
692 to the manufacturer's instructions using the mixed molecular weight transfer setting.  
693 Immuno-blotting was carried out using standard protocols. The C-terminal *TCAB1*  
694 antibody (Proteintech, 14761-1-AP) was used at a 1:2000 dilution, the N-terminal *TCAB1*  
695 antibody (Novus Biologicals, NB100-68252) was used at a 1:1000 dilution, the TERT

696 antibody (Abcam, ab32020) was used at a 1:4000 dilution, the dyskerin antibody (Santa  
697 Cruz Biotech, sc-373956) was used at a 1:200 dilution, the fibrillarin antibody was used  
698 at a 1:2000 dilution (Novus Biologicals, NB300-269), and the lamin B1 antibody was used  
699 a 1:2000 dilution. Secondary antibodies were used at a 1:5000 dilution.

700

## 701 **Northen Blotting**

702 RNA was extracted from cell lysates, cellular fractions, and purified telomerase samples  
703 using the RNeasy Mini kit (Qiagen) and eluted in 30 ul of RNase free water. Purified  
704 telomerase samples were supplemented with 10 ng of a loading and recovery control  
705 prior to RNA extraction (*in vitro* transcribed TR 34-328). 15 ul of eluted RNA was mixed  
706 with 15 ul of 2x formamide loading buffer (0.1XTBE, 25 mM EDTA, 0.1% bromophenol  
707 blue, 0.1% xylene cyanol, 93% formamide) and heated to 60 °C for 5 min. Samples were  
708 separated on a 6% TBE, 7M Urea, polyacrylamide gel (Life Technologies), and  
709 transferred to a Hybond N+ membrane (Cytiva) using a wet-blotting apparatus in 1x TBE  
710 for 2 hours at 0.5 A of constant current in the cold room. After transfer, membranes were  
711 UV-crosslinked, and pre-hybridized in Church buffer for 2 hours at 50 °C. Three DNA  
712 oligos complementary to TR (GACTCGCTCCGTTCTCTTC,  
713 GCTCTAGAATGAACGGTGGAA, CCTGAAAGGCCTGAACCTC,  
714 CGCCTACGCCCTTCTCAGT, ATGTGTGAGCCGAGTCCTG), 7SL  
715 (GCGGACACCCGATCGGCATAGC), U3  
716 (GCCGGCTTCACGCTCAGGAGAAAACGCTACCTCTCTTCCTCGTGG), and 7SK  
717 (GTGTCTGGAGTCTTGGAAGC) were radioactively labeled using T4 PNK (NEB) and  
718 ~10x10<sup>6</sup> cpm of each probe were added to the membrane. Hybridization was carried out



719 at 50 °C overnight. Membranes were washed three times with 2xSSC, 0.1% SDS prior to  
720 exposure to a storage phosphorescence screen (Cytiva) which was then imaged on an  
721 Amersham Typhoon IP phosphoimager (Cytiva).

722

### 723 **Telomerase Expression and Purification**

724 Cell lines were transfected in 15 cm tissue culture plates at ~90% confluency (~25-30x10<sup>6</sup>  
725 cells) using 7.5 µg of TERT plasmid, 30 µg of TR plasmid and 75 µl of Lipofectamine 2000  
726 in 1875 µl of Opti-MEM (Cristofari and Lingner, 2006). Transfected cells were split to three  
727 15 cm dishes 24 hours after transfection. 48 hours after transfection cells were counted,  
728 harvested, and snap frozen in liquid nitrogen. Cells were lysed in 1 ml of CHAPS lysis  
729 buffer supplemented with 5 µl of RiboLock RNase inhibitor (10 mM TRIS pH 7.5, 1 mM  
730 MgCl<sub>2</sub>, 1 mM EGTA pH 8.0, 0.5% CHAPS, 10% glycerol) per 100x10<sup>6</sup> cells and rotated  
731 at 4 °C for 30 min. Lysates were cleared in a table-top centrifuge at 21,000xg for 15 min  
732 at 4 °C. Identical cell equivalents were used for all samples. 45 µg of anti-TERT antibody  
733 was added per ml of cleared lysate and samples were rotated for 1 hour at 4 °C. Lysates  
734 were then added to 100 µl of protein G agarose and rotated for 1 hour at 4 °C. The resin  
735 was spun down at 1000xg and washed four times with 1 ml of Buffer W (20 mM HEPES  
736 pH 7.9, 300 mM KCl, 2 mM MgCl<sub>2</sub>, 1 mM EDTA, 1 mM DTT, 1 mM PMSF, 0.1% Triton X-  
737 100, 10% glycerol). TERT was eluted in 100 µl of Buffer W supplemented with 5 µl of 1  
738 mM TERT peptide by rotating for 30 min at room temperature.

739

### 740 **Telomerase Activity Assays**

741 Telomerase assays were carried out in 20  $\mu$ l of reaction buffer (50 mM TRIS pH 8.0, 150  
742 mM KCl, 1 mM MgCl<sub>2</sub>, 2 mM DTT, 100 nM TTAGGGTTAGGGTTAGG oligo, 10  $\mu$ M dATP,  
743 10  $\mu$ M dGTP, 10  $\mu$ M dTTP, 0.165  $\mu$ M dGTP [ $\alpha$ -<sup>32</sup>P] 3000 Ci/mmol) including 2  $\mu$ l of  
744 purified telomerase for 1 hour at 30 °C. Telomerase was incubated with the substrate  
745 oligo for 15 min at room temperature, prior to initiating the reaction by addition of dNTPs.  
746 Reactions were stopped by adding 100  $\mu$ l of 3.6 M of ammonium acetate supplemented  
747 with 20  $\mu$ g of glycogen and <sup>32</sup>P 5'-end labeled loading control oligos  
748 (TTAGGGTTAGGGTTAGGG, TTAGGGTTAGGGTTAG). Reaction products were  
749 precipitated using 500  $\mu$ l of ice-cold ethanol and stored at -20 °C over-night. Reaction  
750 products were spun down in a table-top centrifuge at max speed for 30 min at 4 °C,  
751 washed with 500  $\mu$ l of 70% ethanol, and spun down again speed for 30 min at 4 °C. The  
752 70% ethanol was decanted, and the reaction products were dried in an Eppendorf  
753 vacuum concentrator at 45 °C. Reaction products were resuspended in 20  $\mu$ l of loading  
754 buffer (0.05XTBE, 25 mM EDTA, 0.05% bromophenol blue, 0.05% xylene cyanol, 46.5%  
755 formamide) and incubated at 95 °C for 5 min. 10  $\mu$ l of each sample was separated on a  
756 12% polyacrylamide, 7 M urea sequencing gel pre-run for 45 min at 90W. Gels were dried  
757 and exposed to a storage phosphorescence screen (Cytiva) and imaged on an  
758 Amersham Typhoon IP phosphoimager (Cytiva).

759

## 760 **Nucleolar Isolation**

761 Cellular fractionation was carried out using a as previously described (Lam and Lamond,  
762 2006). All procedures were carried out on ice and centrifugations at 4 °C. Approximately  
763 1x10<sup>6</sup> million cells were harvested by trypsinization, washed with PBS, followed

764 by incubation in a hypotonic buffer (10 mM HEPES pH 7.9, 10 mM KCl, 1.5 mM MgCl<sub>2</sub>,  
765 0.5 mM DTT) to swell the cells. A small fraction of the swollen cells was collected as input  
766 sample. Swollen cells were then ruptured using pre-cooled dounce homogenizer and the  
767 tight pestle (VWR Cat. 62400-595). The ruptured cells were centrifuged at 218xg for 5  
768 min to pellet nuclei. Nuclei were then resuspended in buffer S1 (0.25 M sucrose, 10 mM  
769 MgCl<sub>2</sub>), layered on top of buffer S2 (0.35 M sucrose, 0.5 mM MgCl<sub>2</sub>) in a 15 ml conical  
770 tube, and centrifuged at 1430xg in a swinging bucket rotor for 5 min to further purify nuclei.  
771 Nuclei were resuspended in buffer S2 and sonicated on ice for 10 seconds at 30% power  
772 (Fisherbrand Model 505, 500W). The sonicated nuclei were then layered on top of buffer  
773 S3 (0.88 M sucrose, 0.5 mM MgCl<sub>2</sub>) and centrifuged at 3000xg in a swinging bucket rotor  
774 for 5 min to further purify nucleoli. The nucleolar pellet was suspended in buffer S2 and  
775 centrifuged a final time at 1430xg to yield a highly purified nucleolar pellet, which was  
776 resuspended in buffer S2. Equal fractions of input, cytoplasm, nuclei, nucleoplasm, and  
777 nucleoli samples were collected and analyzed by western and northern blots. To test the  
778 impact of salt concentration on the integrity of nucleoli, nuclei ruptured by sonication were  
779 mixed 1:1 with buffer S2 containing 40 mM HEPES pH7.9 with and without 715 mM KCl,  
780 prior layering the solution on top of buffer S3.

781

## 782 **Single-Particle Tracking**

783 Single-particle tracking was carried out in MATLAB 2019a using a batch parallel-  
784 processing version of SLIMfast modified to allow the input of TIFF files (kindly provided  
785 by Xavier Darzacq and Anders Hansen) (Hansen et al., 2018), an implementation of the  
786 Multiple-Target-Tracing algorithm (Sergé et al., 2008), with the following settings:

787 Exposure Time = 10 ms, NA = 1.49, Pixel Size = 0.16  $\mu\text{m}$ , Emission Wavelength = 664  
788 nm,  $D_{\text{max}} = 5 \mu\text{m}^2/\text{s}$ , Number of gaps allowed = 2, Localization Error =  $10^{-5}$ , Deflation  
789 Loops = 0. Diffusion coefficients and the fraction of molecules in each distinct particle  
790 population were determined using the MATLAB version of the Spot-On tool (kindly  
791 provided by Xavier Darzacq and Anders Hansen) (Hansen et al., 2018) with the following  
792 settings: TimeGap = 10 ms or 20 ms, dZ = 0.700  $\mu\text{m}$ , GapsAllowed = 2, TimePoints = 8,  
793 JumpsToConsider = 4, BinWidth = 0.01  $\mu\text{m}$ , PDF-fitting, D\_Free1\_3State = [1 25],  
794 D\_Free2\_3State = [0.1 1], D\_Bound\_3State = [0.0001 0.1]. For all experiments we carried  
795 out 3 independent biological replicates with at least 15 cells for each cell line. The  
796 statistical significance of differences in particle fractions and diffusion coefficients were  
797 assessed using a two-tailed T-Test.

798 For the analysis of dyskerin trajectories a mask of the nucleolus was generated manually  
799 using the threshold function in FIJI. Dyskerin trajectories whose coordinates overlapped  
800 with the nucleolar mask for a single frame were designated as nucleolar trajectories. The  
801 remaining trajectories were designated nuclear trajectories. All data sets were then  
802 analyzed using Spot-On as described above.

803

#### 804 **Fluorescence recovery after photobleaching**

805 Fluorescence recovery experiments (FRAP) we carried out using the same Olympus  
806 microscope used for single-molecule imaging. Cells were stained for 10 min with 100 nM  
807 JFX650-HaloTag ligand in complete media. After removing the HaloTag-ligand with three  
808 washes in complete media, cells were placed back in the incubator for 10 min to allow  
809 unincorporated dye to leak out of the cells. Cells were then transferred into  $\text{CO}_2$

810 independent media and put on the microscope which was heated to 37°C. We identified  
811 cells with two clearly visible nucleoli and bleached one of them by placing three diffraction  
812 limited bleach spots within the nucleolar 3xFLAG-HaloTag-dyskerin signal. Each spot was  
813 bleached for 100 ms at 50% laser power, which lead to complete loss of the fluorescence  
814 within the nucleolus. Cells were imaged prior to and after bleaching at 1 frame per second  
815 using the Excelitas X-cite TURBO LED light source and the 100x objective.  
816 Photobleaching due to LED exposure was negligible. To quantify FRAP we first drift  
817 corrected the movie using NanoJ (Laine et al., 2019), we then placed a region of interest  
818 (ROI) within the nucleolus and quantified mean intensity within the ROI over time.  
819 Background signal was determined in an area of the field of view that was not covered by  
820 a cell and subtracted from the nucleolar ROI. In addition, the mean fluorescence after the  
821 bleaching pulse was divided by the fraction of total cellular fluorescence remaining after  
822 the bleaching pulse. Because the laser pulse bleaches a significant amount of total  
823 cellular fluorescence (typically 20-40%), this normalization is critical to determine the  
824 maximal amount of fluorescence recovery possible. For example, if 30% of total cellular  
825 fluorescence is lost due to the bleaching pulse, the maximal fraction of pre-bleach  
826 fluorescence than can theoretically be recovered is 70%. The recovery data was then fit  
827 using a single exponential function ( $1-A*e^{-kt}+C$ ), where k corresponds to the rate constant  
828 and C to the fraction of the initial signal that is not recovered (i.e. the static fraction).

829

### 830 **Quantification of Fixed Cell Imaging**

831 For the quantification of cellular TR distribution in control and TCAB1 knock-out cells we  
832 assigned cells into one of three categories: Cells with TR only at telomeres, Cells with TR

833 only in nucleoli, Cells with TR at telomeres and in nucleoli. We carried out 3 independent  
834 biological replicates and counted a minimum of 100 cells for control and TCAB1 knock-  
835 out cells.

836

### 837 **Quantification of RT-qPCR data**

838 RT-qPCR experiments were carried out in triplicate and the TR Ct value was normalized  
839 to the GAPDH Ct value. The mean  $\Delta$ Ct (Ct of TR – Ct of GAPDH) value from three  
840 independent experiments and the corresponding standard deviation were plotted.

841

### 842 **Quantification of Western Blots, Northern Blots, and Telomerase Activity Assays**

843 Gel images from Western Blots, Northern Blots, and Telomerase Activity Assays were  
844 analyzed using ImageQuant TL 8.2. To quantify TR levels in Northern blots the TR band  
845 intensity was normalized to the loading and recovery control signal added to the RNA  
846 sample prior to RNA purification. To quantify telomerase activity the whole lane intensity  
847 starting at repeat 1 was determined and divided by the sum of the loading control signals.  
848 Telomerase processivity was calculated by dividing product intensity > 7 repeats by the  
849 total signal in the respective lane. The statistical significance of the observed differences  
850 was calculated using a two-tailed T-test using a minimum of three biological replicates.  
851 Each biological replicate (independent telomerase expression and purification) was  
852 analyzed in technical triplicate.

853

854

855 **References**

856  
857

- 858 Angrisani A, Vicidomini R, Turano M, Furia M. 2014. Human dyskerin: beyond  
859 telomeres. *Biol Chem* **395**:593–610. doi:10.1515/hsz-2013-0287
- 860 Armanios M, Blackburn EH. 2012. The telomere syndromes. *Nat Rev Genet* **13**:693  
861 704. doi:10.1038/nrg3246
- 862 Chen L, Roake CM, Freund A, Batista PJ, Tian S, Yin YA, Gajera CR, Lin S, Lee B,  
863 Pech MF, Venteicher AS, Das R, Chang HY, Artandi SE. 2018. An Activity Switch in  
864 Human Telomerase Based on RNA Conformation and Shaped by TCAB1. *Cell* **174**.  
865 doi:10.1016/j.cell.2018.04.039
- 866 Cohen SB, Graham ME, Lovrecz GO, Bache N, Robinson PJ, Reddel RR. 2007. Protein  
867 Composition of Catalytically Active Human Telomerase from Immortal Cells. *Science*  
868 **315**:1850–1853. doi:10.1126/science.1138596
- 869 Cong L, Ran FA, Cox D, Lin S, Barretto R, Habib N, Hsu PD, Wu X, Jiang W, Marraffini  
870 LA, Zhang F. 2013. Multiplex Genome Engineering Using CRISPR/Cas Systems.  
871 *Science* **339**:819–823. doi:10.1126/science.1231143
- 872 Cristofari G, Lingner J. 2006. Telomere length homeostasis requires that telomerase  
873 levels are limiting. *Embo J* **25**:565–574. doi:10.1038/sj.emboj.7600952
- 874 Feric M, Vaidya N, Harmon TS, Mitrea DM, Zhu L, Richardson TM, Kriwacki RW, Pappu  
875 RV, Brangwynne CP. 2016. Coexisting Liquid Phases Underlie Nucleolar  
876 Subcompartments. *Cell* **165**:1686–1697. doi:10.1016/j.cell.2016.04.047
- 877 Freund A, Zhong FL, Venteicher AS, Meng Z, Veenstra TD, Frydman J, Artandi SE.  
878 2014. Proteostatic Control of Telomerase Function through TRiC-Mediated Folding of  
879 TCAB1. *Cell* **159**:1389–1403. doi:10.1016/j.cell.2014.10.059
- 880 Gallardo F, Olivier C, Dandjinou AT, Wellinger RJ, Chartrand P. 2008. TLC1 RNA  
881 nucleo-cytoplasmic trafficking links telomerase biogenesis to its recruitment to  
882 telomeres. *Embo J* **27**:748–757. doi:10.1038/emboj.2008.21
- 883 Ghanim GE, Fountain AJ, Roon A-MM van, Rangan R, Das R, Collins K, Nguyen THD.  
884 2021. Structure of human telomerase holoenzyme with bound telomeric DNA. *Nature*  
885 1–5. doi:10.1038/s41586-021-03415-4
- 886 Grimm JB, English BP, Chen J, Slaughter JP, Zhang Z, Revyakin A, Patel R, Macklin  
887 JJ, Normanno D, Singer RH, Lionnet T, Lavis LD. 2015. A general method to improve

- 888 fluorophores for live-cell and single-molecule microscopy. *Nat Methods* **12**:244 50–3  
889 p following 250. doi:10.1038/nmeth.3256
- 890 Grimm JB, Xie L, Casler JC, Patel R, Tkachuk AN, Choi H, Lippincott-Schwartz J,  
891 Brown TA, Glick BS, Liu Z, Lavis LD. 2020. Deuteration improves small-molecule  
892 fluorophores. *Biorxiv* 2020.08.17.250027. doi:10.1101/2020.08.17.250027
- 893 Hansen AS, Woringer M, Grimm JB, Lavis LD, Tjian R, Darzacq X. 2018. Robust  
894 model-based analysis of single-particle tracking experiments with Spot-On. *Elife* **7**.  
895 doi:10.7554/elife.33125
- 896 Heiss NS, Girod A, Salowsky R, Wiemann S, Pepperkok R, Poustka A. 1999. Dyskerin  
897 Localizes to the Nucleolus and Its Mislocalization Is Unlikely to Play a Role in the  
898 Pathogenesis of Dyskeratosis Congenita. *Hum Mol Genet* **8**:2515–2524.  
899 doi:10.1093/hmg/8.13.2515
- 900 Hyman AA, Weber CA, Jülicher F. 2014. Liquid-Liquid Phase Separation in Biology.  
901 *Annu Rev Cell Dev Bi* **30**:39–58. doi:10.1146/annurev-cellbio-100913-013325
- 902 Jády BE, Bertrand E, Kiss T. 2004. Human telomerase RNA and box H/ACA scaRNAs  
903 share a common Cajal body–specific localization signal. *J Cell Biology* **164**:647–652.  
904 doi:10.1083/jcb.200310138
- 905 Laine RF, Tosheva KL, Gustafsson N, Gray RDM, Almada P, Albrecht D, Risa GT,  
906 Hurtig F, Linds A-C, Baum B, Mercer J, Leterrier C, Pereira PM, Culley S, Henriques  
907 R. 2019. NanoJ: a high-performance open-source super-resolution microscopy  
908 toolbox. *J Phys D Appl Phys* **52**:163001. doi:10.1088/1361-6463/ab0261
- 909 Lam YW, Lamond AI. 2006. Cell Biology (Third Edition). *Part Organelles Cell Struct*  
910 *Sect 1 isolation Plasma Membr Organelles Cell Struct Sect 1 Isol Plasma Membr*  
911 *Organelles Cell Struct* 103–107. doi:10.1016/b978-012164730-8/50087-3
- 912 Laprade H, Querido E, Smith MJ, Guérit D, Crimmins H, Conomos D, Pourret E,  
913 Chartrand P, Sfeir A. 2020. Single-Molecule Imaging of Telomerase RNA Reveals a  
914 Recruitment-Retention Model for Telomere Elongation. *Mol Cell*.  
915 doi:10.1016/j.molcel.2020.05.005
- 916 Mitrea DM, Kriwacki RW. 2016. Phase separation in biology; functional organization of a  
917 higher order. *Cell Commun Signal Ccs* **14**:1. doi:10.1186/s12964-015-0125-7
- 918 Nagpal N, Wang J, Zeng J, Lo E, Moon DH, Luk K, Braun RO, Burroughs LM, Keel SB,  
919 Reilly C, Lindsley RC, Wolfe SA, Tai AK, Cahan P, Bauer DE, Fong YW, Agarwal S.  
920 2020. Small-Molecule PAPD5 Inhibitors Restore Telomerase Activity in Patient Stem  
921 Cells. *Cell Stem Cell* **26**:896-909.e8. doi:10.1016/j.stem.2020.03.016



- 922 Nandakumar J, Bell CF, Weidenfeld I, Zaug AJ, Leinwand LA, Cech TR. 2012. The TEL  
923 patch of telomere protein TPP1 mediates telomerase recruitment and processivity.  
924 *Nature* **492**:285–289. doi:10.1038/nature11648
- 925 Nandakumar J, Cech TR. 2013. Finding the end: recruitment of telomerase to  
926 telomeres. *Nat Rev Mol Cell Bio* **14**. doi:10.1038/nrm3505
- 927 Riback JA, Zhu L, Ferrolino MC, Tolbert M, Mitrea DM, Sanders DW, Wei M-T, Kriwacki  
928 RW, Brangwynne CP. 2020. Composition-dependent thermodynamics of intracellular  
929 phase separation. *Nature* **581**:209–214. doi:10.1038/s41586-020-2256-2
- 930 Schmidt JC, Cech TR. 2015. Human telomerase: biogenesis, trafficking, recruitment,  
931 and activation. *Gene Dev* **29**:1095–1105. doi:10.1101/gad.263863.115
- 932 Schmidt JC, Dalby AB, Cech TR. 2014. Identification of human TERT elements  
933 necessary for telomerase recruitment to telomeres. *Elife* **3**:e03563.  
934 doi:10.7554/elife.03563
- 935 Schmidt JC, Zaug AJ, Cech TR. 2016. Live Cell Imaging Reveals the Dynamics of  
936 Telomerase Recruitment to Telomeres. *Cell* **166**:1188–1197.e9.  
937 doi:10.1016/j.cell.2016.07.033
- 938 Schmidt JC, Zaug AJ, Kufer R, Cech TR. 2018. Dynamics of human telomerase  
939 recruitment depend on template-telomere base pairing. *Mol Biol Cell* **29**:869–880.  
940 doi:10.1091/mbc.e17-11-0637
- 941 Sergé A, Bertaux N, Rigneault H, Marguet D. 2008. Dynamic multiple-target tracing to  
942 probe spatiotemporal cartography of cell membranes. *Nat Methods* **5**:687–694.  
943 doi:10.1038/nmeth.1233
- 944 Shukla S, Jeong H-C, Sturgeon CM, Parker R, Batista LFZ. 2020. Chemical inhibition of  
945 PAPD5/7 rescues telomerase function and hematopoiesis in dyskeratosis congenita.  
946 *Blood Adv* **4**:2717–2722. doi:10.1182/bloodadvances.2020001848
- 947 Shukla S, Schmidt JC, Goldfarb KC, Cech TR, Parker R. 2016. Inhibition of telomerase  
948 RNA decay rescues telomerase deficiency caused by dyskerin or PARN defects. *Nat*  
949 *Struct Mol Biol* **23**:286–292. doi:10.1038/nsmb.3184
- 950 Southern E. 2006. Southern blotting. *Nat Protoc* **1**:518–525. doi:10.1038/nprot.2006.73
- 951 Stern JL, Zyner KG, Pickett HA, Cohen SB, Bryan TM. 2012. Telomerase Recruitment  
952 Requires both TCAB1 and Cajal Bodies Independently. *Mol Cell Biol* **32**:2384–2395.  
953 doi:10.1128/mcb.00379-12
- 954 Stewart SA, Weinberg RA. 2006. Telomeres: Cancer to Human Aging. *Annu Rev Cell*  
955 *Dev Bi* **22**:531–557. doi:10.1146/annurev.cellbio.22.010305.104518

- 956 Stuart BD, Choi J, Zaidi S, Xing C, Holohan B, Chen R, Choi M, Dharwadkar P, Torres  
957 F, Girod CE, Weissler J, Fitzgerald J, Kershaw C, Klesney-Tait J, Mageto Y, Shay  
958 JW, Ji W, Bilguvar K, Mane S, Lifton RP, Garcia CK. 2015. Exome sequencing links  
959 mutations in PARN and RTEL1 with familial pulmonary fibrosis and telomere  
960 shortening. *Nat Genet* **47**:512–517. doi:10.1038/ng.3278
- 961 Tokunaga M, Imamoto N, Sakata-Sogawa K. 2008. Highly inclined thin illumination  
962 enables clear single-molecule imaging in cells. *Nat Methods* **5**:159–161.  
963 doi:10.1038/nmeth1171
- 964 Tomlinson RL, Ziegler TD, Supakorndej T, Terns RM, Terns MP. 2006. Cell cycle-  
965 regulated trafficking of human telomerase to telomeres. *Mol Biol Cell* **17**:955–965.  
966 doi:10.1091/mbc.e05-09-0903
- 967 Tseng C-K, Wang H-F, Burns AM, Schroeder MR, Gaspari M, Baumann P. 2015.  
968 Human Telomerase RNA Processing and Quality Control. *Cell Reports* **13**:2232–  
969 2243. doi:10.1016/j.celrep.2015.10.075
- 970 Tummala H, Walne A, Collopy L, Cardoso S, Fuente J de la, Lawson S, Powell J,  
971 Cooper N, Foster A, Mohammed S, Plagnol V, Vulliamy T, Dokal I. 2015. Poly(A)-  
972 specific ribonuclease deficiency impacts telomere biology and causes dyskeratosis  
973 congenita. *J Clin Invest* **125**:2151–2160. doi:10.1172/jci78963
- 974 Tycowski KT, Shu M-D, Kukoyi A, Steitz JA. 2009. A conserved WD40 protein binds the  
975 Cajal body localization signal of scaRNP particles. *Mol Cell* **34**:47–57.  
976 doi:10.1016/j.molcel.2009.02.020
- 977 Venteicher AS, Abreu EB, Meng Z, McCann KE, Terns RM, Veenstra TD, Terns MP,  
978 Artandi SE. 2009. A human telomerase holoenzyme protein required for Cajal body  
979 localization and telomere synthesis. *Science* **323**:644–648.  
980 doi:10.1126/science.1165357
- 981 Vogan JM, Zhang X, Youmans DT, Regalado SG, Johnson JZ, Hockemeyer D, Collins  
982 K. 2016. Minimized human telomerase maintains telomeres and resolves  
983 endogenous roles of H/ACA proteins, TCAB1, and Cajal bodies. *Elife* **5**:693.  
984 doi:10.7554/elife.18221
- 985 Wang W, Budhu A, Forgues M, Wang XW. 2005. Temporal and spatial control of  
986 nucleophosmin by the Ran–Crm1 complex in centrosome duplication. *Nat Cell Biol*  
987 **7**:823–830. doi:10.1038/ncb1282
- 988 Weidenfeld I, Gossen M, Löw R, Kentner D, Berger S, Görlich D, Bartsch D, Bujard H,  
989 Schönig K. 2009. Inducible expression of coding and inhibitory RNAs from  
990 retargetable genomic loci. *Nucleic Acids Res* **37**:e50. doi:10.1093/nar/gkp108

- 991 Wu RA, Upton HE, Vogan JM, Collins K. 2017. Telomerase Mechanism of Telomere  
992 Synthesis. *Annu Rev Biochem* **86**:439–460. doi:10.1146/annurev-biochem-061516-  
993 045019
- 994 Xi L, Cech TR. 2014. Inventory of telomerase components in human cells reveals  
995 multiple subpopulations of hTR and hTERT. *Nucleic Acids Res* **42**:8565–8577.  
996 doi:10.1093/nar/gku560
- 997 Zhong F, Savage SA, Shkreli M, Giri N, Jessop L, Myers T, Chen R, Alter BP, Artandi  
998 SE. 2011. Disruption of telomerase trafficking by TCAB1 mutation causes  
999 dyskeratosis congenita. *Gene Dev* **25**:11–16. doi:10.1101/gad.2006411
- 1000 Zhong FL, Batista LFZ, Freund A, Pech MF, Venteicher AS, Artandi SE. 2012. TPP1  
1001 OB-Fold Domain Controls Telomere Maintenance by Recruiting Telomerase to  
1002 Chromosome Ends. *Cell* **150**:481–494. doi:10.1016/j.cell.2012.07.012
- 1003
- 1004

1005 **Supplementary Information**

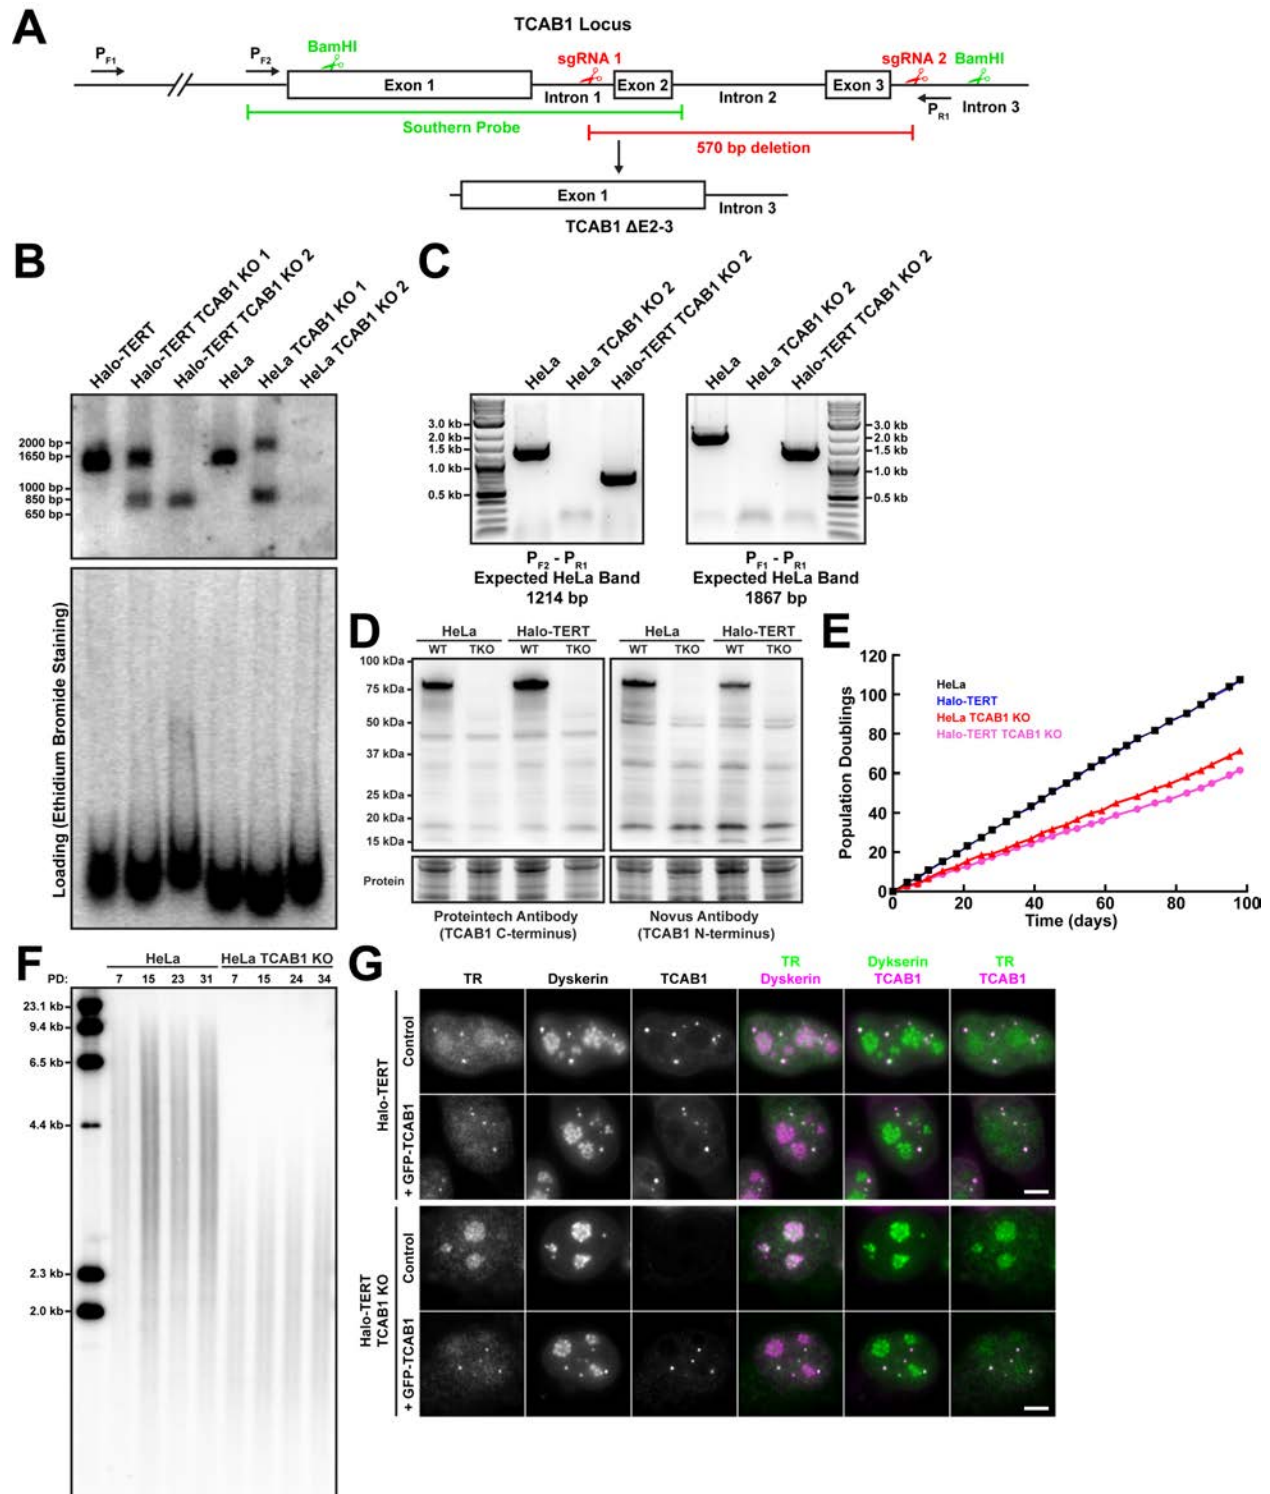

1006

1007 **Figure 1 – Figure Supplement 1. (A)** Strategy to knock-out TCAB1 using Cas9 and two sgRNAs  
 1008 targeting introns 1 and 3. **(B)** Southern blot of genomic DNA digested with BamHI from parental cells and  
 1009 TCAB1 knock-out clones using a probes generated from a PCR product of the TCAB1 gene indicated in

1010 (A) demonstrating the expected truncation of the *TCAB1* gene in Halo-TERT *TCAB1* KO 2. HeLa *TCAB1*  
1011 KO 2 carries larger deletions completely removing exons 1 and 2 from the *TCAB1* gene. (C) PCR using  
1012 primers indicated in (A) of genomic DNA from parental cells and *TCAB1* knock-out clones confirming the  
1013 deletion of critical regions of the *TCAB1* gene show in (B). (D) Western blots demonstrating the absence  
1014 of *TCAB1* protein in *TCAB1* knock-out cell lines generated in HeLa and Halo-TERT cells lines using two  
1015 antibodies targeting the N-terminus and C-terminus of *TCAB1*. (E) Growth rate of parental and *TCAB1*  
1016 knock-out cell lines. (F) Telomere length analysis by Southern blot of telomeric restriction fragments,  
1017 indicating that telomeres in *TCAB1* knock-out cells are short but stable in length. (G) Immuno-  
1018 fluorescence with anti-dyskerin and anti-*TCAB1* antibodies coupled to fluorescence in-situ hybridization  
1019 with probes against TR, demonstrating that expression of GFP-*TCAB1* in *TCAB1* knock-out cells rescues  
1020 TR localization to Cajal bodies (scale bar = 5  $\mu$ m).  
1021

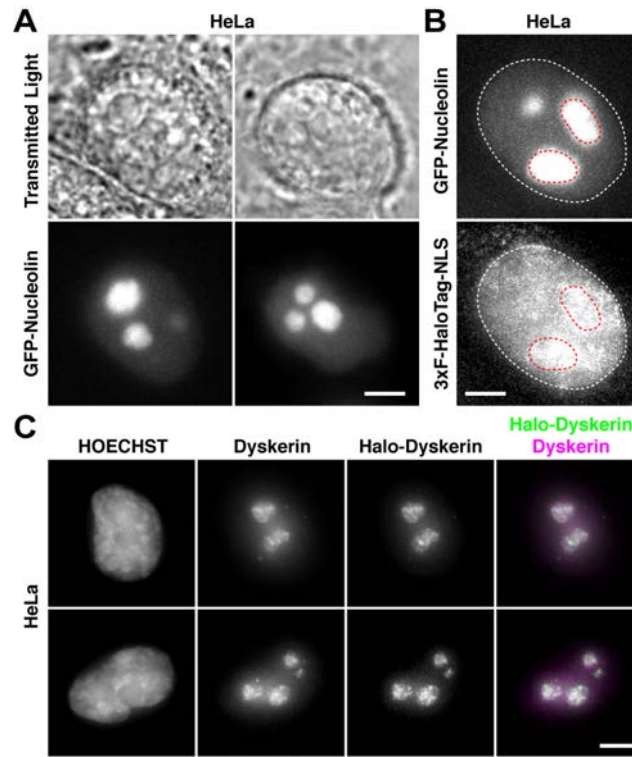

1022

1023 **Figure 2 – Figure Supplement 1.** (A) Images of HeLa cells transiently expressing GFP-nucleolin to mark  
1024 nucleoli. The GFP-nucleolin signal overlaps with circular shapes visible under transmitted light illumination  
1025 (scale bar = 2  $\mu$ m). (B) Images of HeLa cells transiently expressing GFP-nucleolin and 3xFLAG-HaloTag-  
1026 NLS labeled with JF646. The 3xFLAG-HaloTag-NLS signal (maximum intensity projection of 1000 frames  
1027 of a single-molecule imaging movie) clearly overlaps with the GFP-nucleolin signal (red dashed outline),  
1028 demonstrating that 3xFLAG-HaloTag-NLS can enter the nucleolus (scale bar = 2  $\mu$ m). (C) Images of HeLa  
1029 cells transiently expressing 3xFLAG-HaloTag-dyskerin labeled with JF646 and probed with an antibody  
1030 against dyskerin, demonstrating that 3xFLAG-HaloTag-dyskerin localizes to the nucleolus (scale bar = 5  
1031  $\mu$ m).

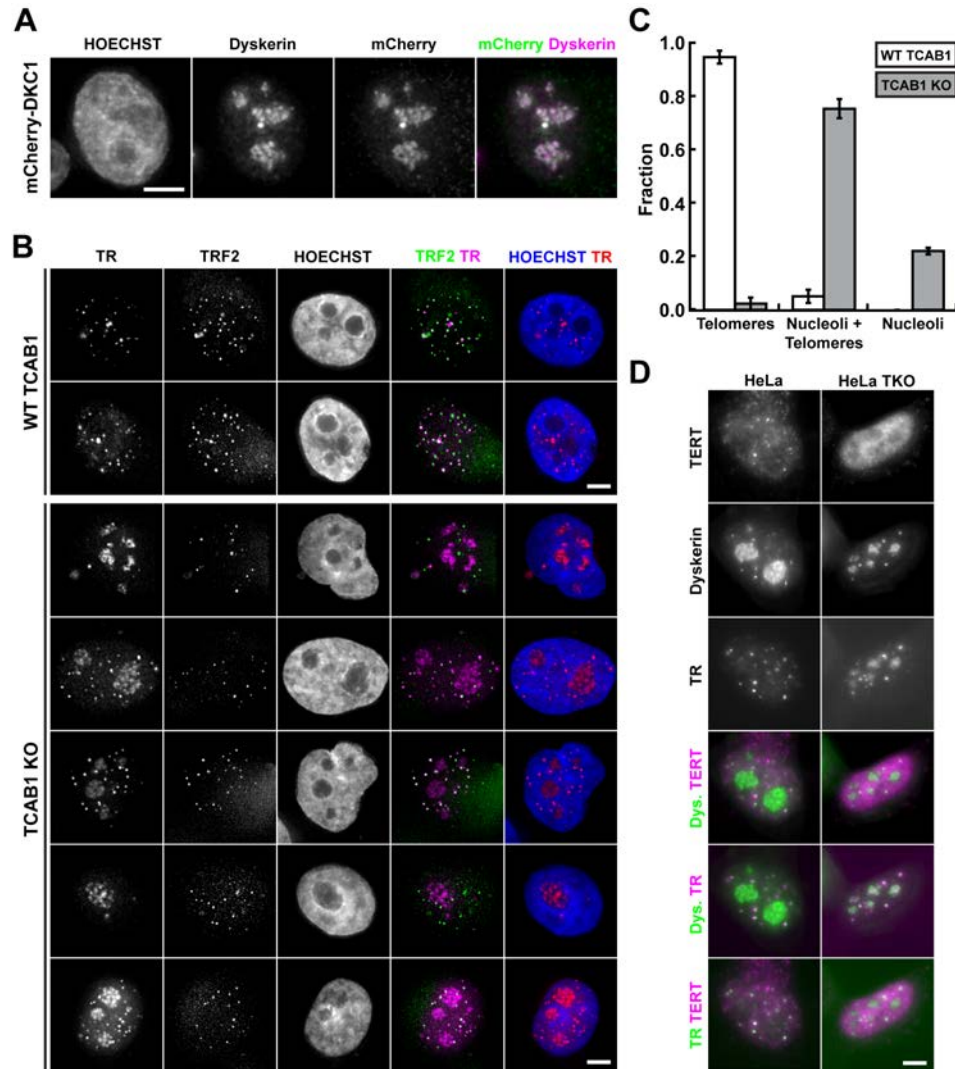

1032

1033 **Figure 3 – Figure Supplement 1. (A)** Images of HeLa cells transiently expressing mCherry-dyskerin  
 1034 probed with antibodies against mCherry and dyskerin, demonstrating that mCherry dyskerin localizes to the  
 1035 nucleolus (scale bar = 5  $\mu$ m). **(B)** Images of control and TCAB1 knock-out HeLa cells (3xFLAG-Halo-TERT,  
 1036 mEOS3.2-TRF2) overexpressing untagged TERT and TR. TR was detected using FISH and TRF2 was  
 1037 visualized using the fluorescence signal from mEOS3.2-TRF2. In control cells TR co-localizes with  
 1038 telomeres, while it is enriched in nucleoli and localized to telomeres in TCAB1 KO cells (scale bar = 5  $\mu$ m).  
 1039 **(C)** Quantification of the fraction of cells showing TR localization exclusively to telomeres, to telomeres and  
 1040 nucleoli, or only to nucleoli (2 independent experiments, >100 cells per experiment, mean  $\pm$  standard  
 1041 deviation). **(D)** Images of HeLa cells and TCAB1 knock-out cells transiently expressing untagged TERT and  
 1042 TR, probed with TERT (Abcam) and dyskerin antibodies and FISH for TR demonstrating that untagged  
 1043 TERT is excluded from nucleoli marked by dyskerin in parental and TCAB1 knock-out cells.

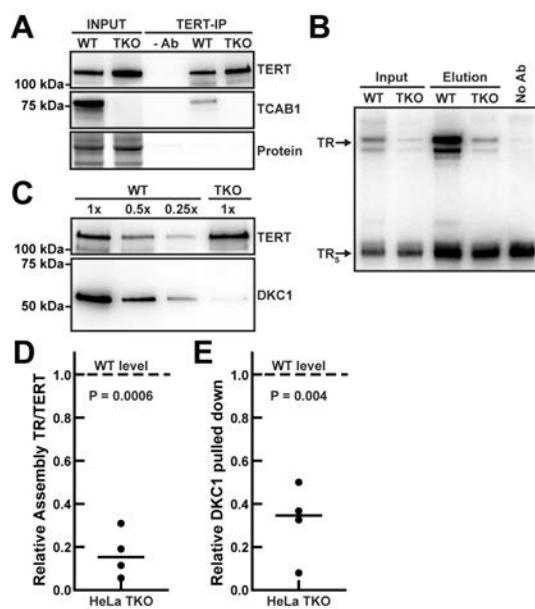

1044

1045 **Figure 4 – Figure Supplement 1. (A)** Western blots analyzing TERT immuno-purification (using a sheep  
 1046 anti-TERT antibody) from Halo-TERT cells overexpressing TERT and TR probed with a rabbit anti-TERT  
 1047 antibody (Abcam) and a TCAB1 antibody. **(B)** Northern blot of RNA extracted from input and purified TERT  
 1048 samples from Halo-TERT cells overexpressing TERT and TR probed with radiolabeled DNA  
 1049 oligonucleotides complementary to TR. Standards are *in vitro* transcribed full-length TR and truncated TR<sub>s</sub>.  
 1050 TR<sub>s</sub> was added to samples prior to RNA extraction as loading and recovery control. **(C)** Western blots to  
 1051 analyze immuno-purified telomerase RNP composition from Halo-TERT cells. A single membrane was cut  
 1052 into two pieces that were probed with TERT and dyskerin antibodies, respectively. **(D-E)** Quantification of  
 1053 the amount of **(D)** the ratio of TR to TERT (n = 4), and **(E)** dyskerin (n = 4) in TERT purifications from Halo-  
 1054 TERT TCAB1 knock-out cells overexpressing TERT and TR compared to parental controls (mean, T-Test).  
 1055 The dashed lines indicate the level in telomerase purified from wild-type TCAB1 control cells which was  
 1056 normalized to 1.0.

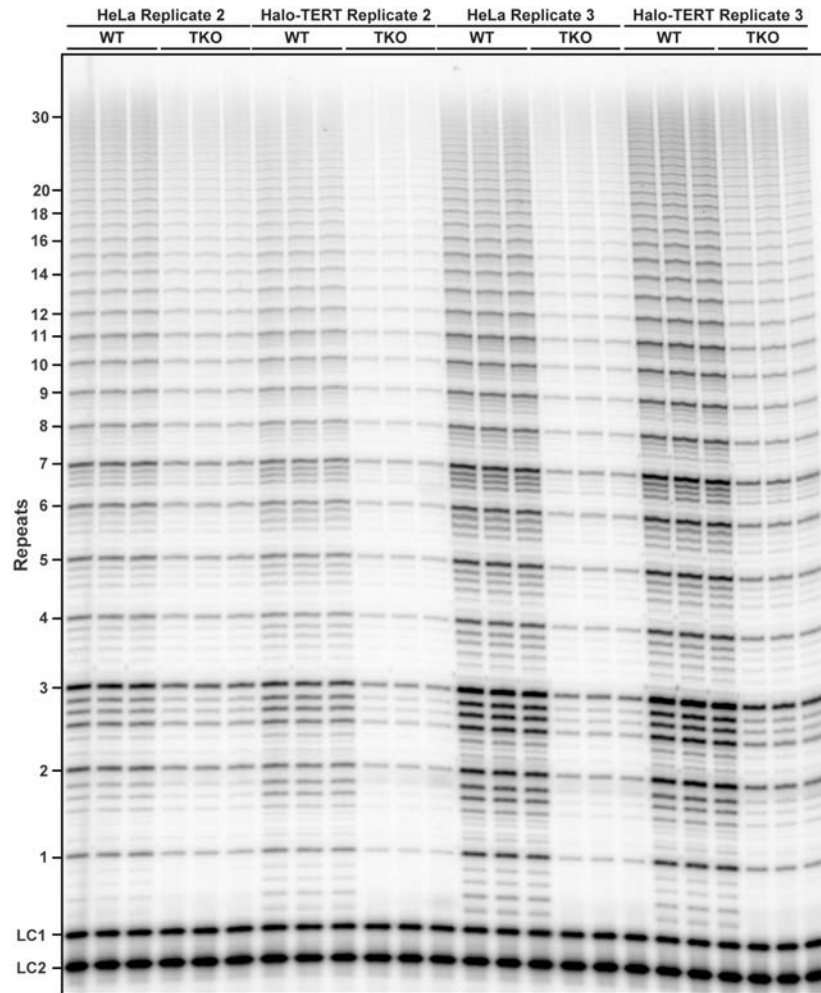

1057

1058 **Figure 5 – Figure Supplement 1.** Direct telomerase extension assay of telomerase immuno-purified from  
1059 parental (WT) and TCAB1 knock-out (TKO) HeLa and Halo-TERT cell lines. LC1 and LC2, radiolabeled  
1060 DNA oligonucleotide loading controls.

1061



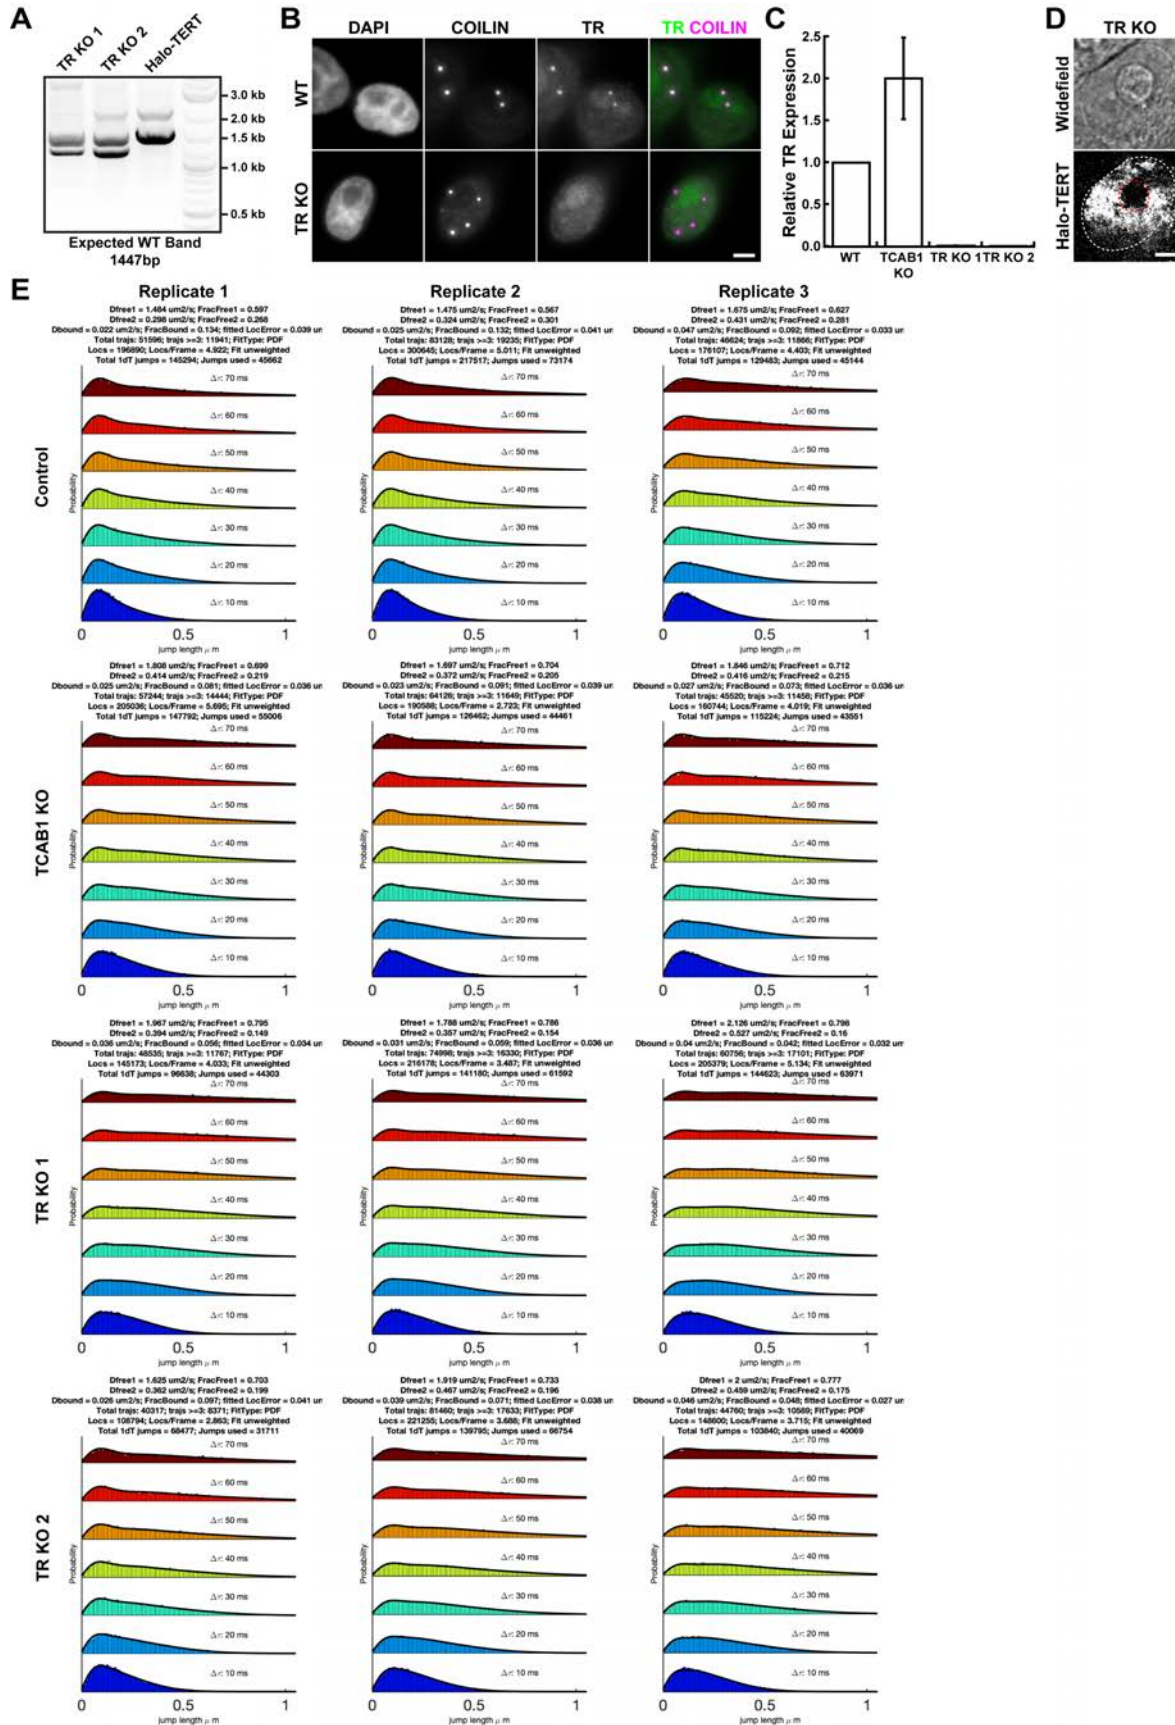

1063 **Figure 6 – Figure Supplement 1. (A)** PCR analysis of the TR locus in parental and TR knock-out clones.  
1064 Both TR knock-out clones show PCR products with reduced length that were confirmed to be knock-outs  
1065 by Sanger sequencing. **(B)** Images of control and TR knock-out cells probed with an antibody against  
1066 coilin and FISH probes specific for TR, demonstrating the lack of TR signal in TR knock-out cells (scale  
1067 bar = 5  $\mu$ m). **(C)** Determination of TR levels in control, TCAB1 knock-out, and TR knock-out cells, using  
1068 RT-qPCR with primers specific to TR normalized to GAPDH (3 independent biological replicates, 3  
1069 technical replicates for each biological replicate, mean  $\pm$  standard deviation). **(D)** Maximum intensity  
1070 projection of 2000 frames of a 3xFLAG-HaloTag (JF646) TERT movie (bottom), demonstrating that the  
1071 TERT signal does not overlap with the nucleolus detected as circular shape in the transmitted light image  
1072 (top, red dashed line). **(E)** Fitting of single-particle tracking data of TERT from control, TCAB1 knock-out,  
1073 and TR knock-out cells expressing 3xFLAG-HaloTag-TERT using the Spot-On tool.  
1074  
1075

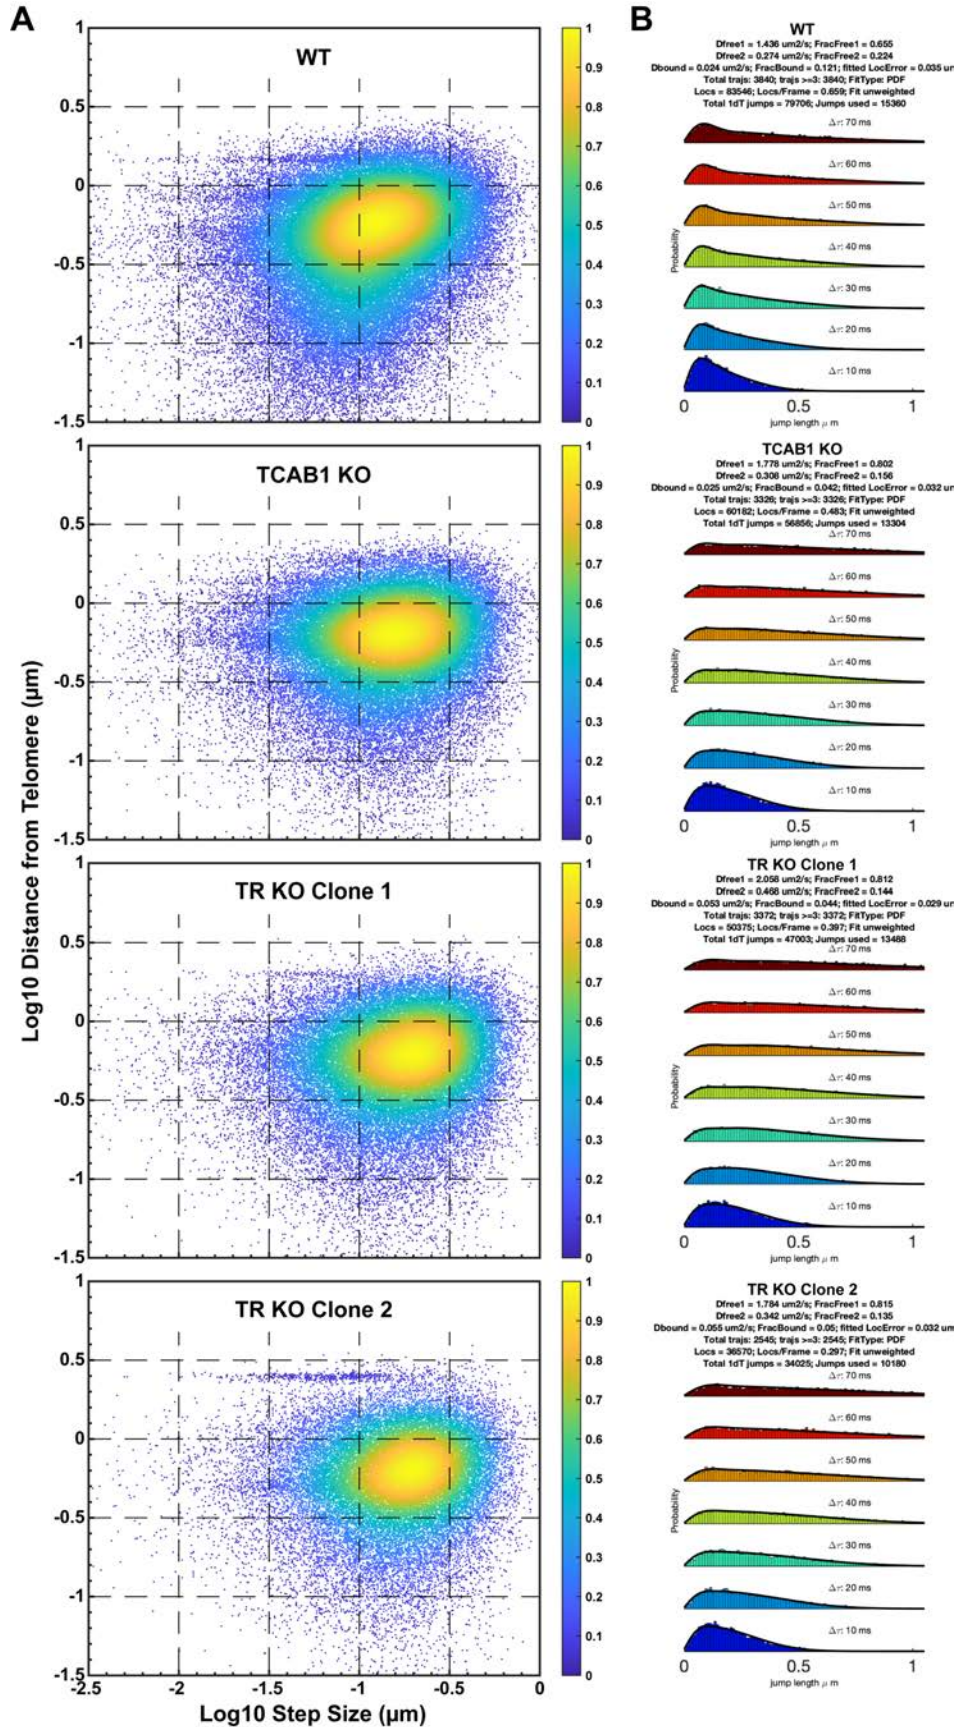

1077 **Figure 6 – Figure Supplement 2. (A)** Analysis of the step size of telomeric TERT particles relative to the  
 1078 distance of the particle to the closest telomere (pooled results from 3 independent biological replicates with  
 1079 19-30 cells analyzed per replicate). TERT molecules bound to the telomere are expected to have small  
 1080 step sizes and a short distance to the closest telomere, which is apparent in the enrichment of events in  
 1081 the lower quadrants in the WT control. This enrichment is not observed in TCAB1 and TR knock-out cells.  
 1082 **(B)** Spot-On analysis of telomeric TERT particles (pooled results from 3 independent biological replicates  
 1083 with 19-30 cells analyzed per replicate). The fraction of bound TERT particles in TCAB1 and TR knock-out  
 1084 cells is 4-5%, compared to 12% in the WT control cells.  
 1085

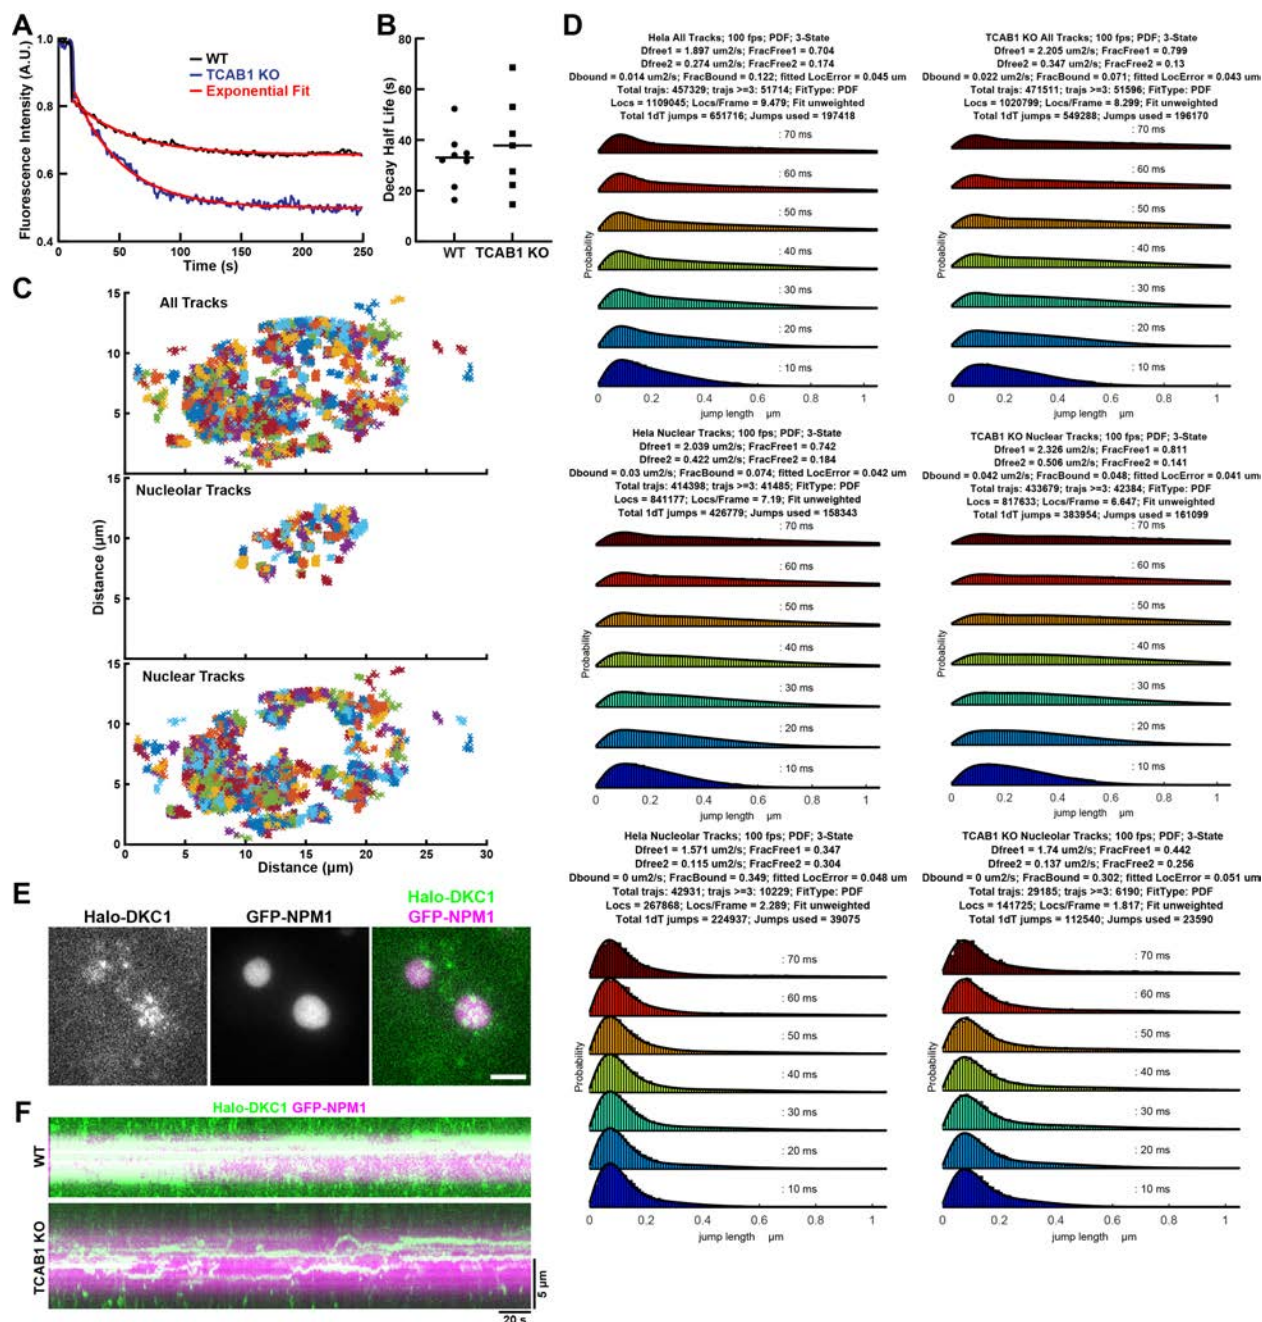

1086 **Figure 7 – Figure Supplement 1. (A)** Fluorescence recovery curves of nucleolar dyskerin in the inbleached  
 1087 nucleolus of control and TCAB1 knock-out cells. Data was fit with a single exponential function. **(B)**  
 1088 Quantification of half-life of fluorescence recovery, calculated from the rate constant of the single  
 1089 exponential fit of the data shown in **(A)** (n = 8 and 7, mean). **(C)** Trajectories of all (top), nucleolar (middle),  
 1090

1091 and nucleoplasmic dyskerin particles. **(D)** Spot-On analysis of dyskerin diffusion of all (top), nucleolar  
1092 (middle), and nucleoplasmic dyskerin particles. **(E)** Fluorescence images of single 3xFLAG-HaloTag-  
1093 dyskerin particles, and nucleoli marked by GFP-NPM1 in a cell imaged at 1 frame per second (scale bar =  
1094 5  $\mu$ m). **(F)** Kymographs of nucleolar 3xFLAG-HaloTag-dyskerin particles imaged at 1 frame per second.  
1095

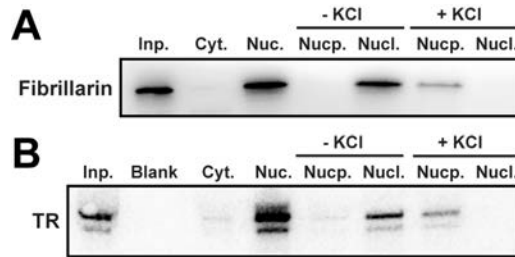

1096  
1097  
1098 **Figure 8 – Figure Supplement 1. (A)** Western blot and **(B)** Northern blot of cellular fractions from TCAB1  
1099 knock-out cells probed with an antibody against fibrillarin and probes for TR, respectively. Ruptured nuclei  
1100 were either maintained at a low salt concentration or exposed to 357.5 mM KCl. The results demonstrate  
1101 that nucleoli are dissolved in the presence of a high salt concentration, releasing fibrillarin and TR into the  
1102 nucleoplasmic fraction.  
1103

1104

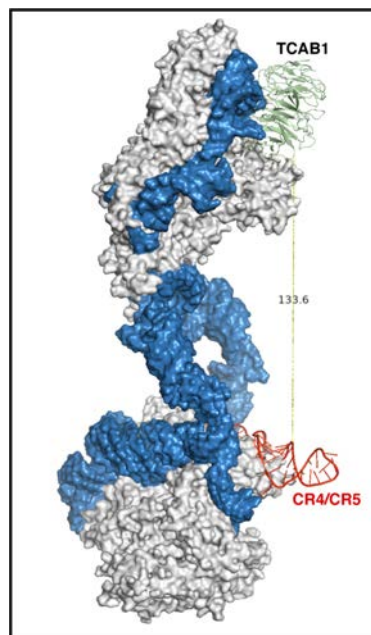

1105  
1106 **Figure 8 – Figure Supplement 2. (A)** Structure of the telomerase RNP showing the distance between  
1107 TCAB1 and CR4/CR5 (13.4 nm). TR in blue, CR4/CR5 in red, and TCAB1 in green (Ghanim et al., 2021).  
1108

1109

1110 **Movie Legends**

1111

1112 **Movie 1.** Single-particle tracking of 3xFLAG-HaloTag-TERT labeled with JF646 in a  
1113 control cell acquired at 100 frames per second. Trajectories with a minimum of 5  
1114 localizations are displayed. 150x150 pixels with a pixel size of 0.16  $\mu\text{m}$ .

1115

1116 **Movie 2.** Single-particle tracking of 3xFLAG-HaloTag-TERT labeled with JF646 in a  
1117 TCAB1 knock-out cell acquired at 100 frames per second. Trajectories with a minimum  
1118 of 5 localizations are displayed. 150x150 pixels with a pixel size of 0.16  $\mu\text{m}$ .

1119

1120 **Movie 3.** Movie of cell expressing GFP-nucleolin (red) and 3xFLAG-HaloTag-NLS (green)  
1121 labeled with JF646 acquired at 100 frames per second, showing overlap of 3xFLAG-  
1122 HaloTag-NLS with nucleoli. 140x140 pixels with a pixel size of 0.16  $\mu\text{m}$ .

1123

1124 **Movie 4.** Movie of 3xFLAG-HaloTag-TERT labeled with JF646 in a control (left), TCAB1  
1125 knock-out (middle), and TR knock-out (right) cell acquired at 100 frames per second.  
1126 Each panel is 150x150 pixels in size with a pixel size of 0.16  $\mu\text{m}$ .

1127

1128 **Movie 5.** Single-particle tracking of 3xFLAG-HaloTag-TERT labeled with JF646 in a TR  
1129 knock-out cells acquired at 100 frames per second. Trajectories with a minimum of 5  
1130 localizations are displayed. 150x150 pixels with a pixel size of 0.16  $\mu\text{m}$ .

1131

1132 **Movie 6.** Fluorescence recovery after photobleaching of HaloTag-dyskerin labeled with  
1133 JFX650 HaloTag-ligand expressed in control cells acquired at 1 frame per second.

1134

1135 **Movie 7.** Fluorescence recovery after photobleaching of HaloTag-dyskerin labeled with  
1136 JFX650 HaloTag-ligand expressed in TCAB1 knock-out cells cells acquired at 1 frame  
1137 per second.

1138

1139 **Movie 8.** Movie of cells expressing GFP-nucleolin (magenta) and HaloTag-dyskerin  
1140 labeled with JFX650 (green) in control cells acquired at 100 frames per second.

1141

1142 **Movie 9.** Movie of cells expressing GFP-nucleolin (magenta) and HaloTag-dyskerin  
1143 labeled with JFX650 (green) in control cells acquired at 1 frame per second.

1144

1145

1146
